# Supplementary material for: Pyrrolidine modified PANF catalyst for asymmetric Michael addition of ketones to nitrostyrenes in aqueous phase
Source: Royal Society of Chemistry journal article supplement (doi:10.1039/c5gc02622a), 2016-01-01
Supplement: c5gc02622a1.pdf [file c5gc02622a1.pdf]

## Supporting Information

### Pyrrolidine Modified PANF Catalyst for Asymmetric Michael

#### Addition of Ketones to Nitrostyrenes in Aqueous Phase

Jianguo Du, Bin Shuai, Minli Tao\*, Guangwei Wang\*, Wenqin Zhang\*

|                                                                               |     |
|-------------------------------------------------------------------------------|-----|
| 1. General information.....                                                   | S2  |
| 2. Synthesis of the fiber catalysts.....                                      | S2  |
| 3. The determination of disulfide formation.....                              | S7  |
| 4. Typical procedure for the Michael reaction .....                           | S8  |
| 5. The BET surfaces of fiber catalyst.....                                    | S9  |
| 6. The adsorbance of catalyst 6 for <i>trans</i> - $\beta$ -nitrostyrene..... | S9  |
| 7. The time-on-stream of the flow system.....                                 | S9  |
| 8. Spectroscopic and chromatographic data for Michael adducts.....            | S10 |
| 9. NMR and HPLC spectra for Michael adducts.....                              | S14 |

## 1. General Information

A commercially available polyacrylonitrile fiber (PANF) with a length of 10 cm and a diameter of  $30 \pm 0.5 \mu\text{m}$  (from the Fushun Petrochemical Corporation of China) was used. The aldehydes, ketones, *N,N*-dimethyl-1,3-propanediamine and all the other reagents were of analytical grade and used without further purification. Non-commercial materials were prepared and then purified by column chromatography.

FTIR spectra (Fourier Transform infrared spectroscopy) were obtained with an AVATAR360 FTIR spectrometer (Thermo Nicolet). Elemental analyses were performed on an Elementar vario EL analyzer. A Hitachi S-4800 scanning electron microscopy (SEM) was used to characterize the surface of the modified fibers.  $^1\text{H}$  NMR spectra were recorded on BRUKER-AVANCE III (600 MHz) and BRUKER-AVANCE III (400MHz) instruments using tetramethyl silane as the internal standard. HPLC analysis was performed on Waters-Model 510 using ChiralPak columns purchased from Daicel Chemical Industries, LTD. Racemic standard products were prepared under the catalysis of DL-proline to optimize the HPLC conditions. Optical rotations were determined using an Autopol IV automatic polarimeter. Contact angle measurements were conducted with a POWEREACH-JC2000DI contact angle system under room temperature. BET surface was determined by low pressure adsorption device with a pressure sensor of Microsensor-MPM480. The UV spectrophotometer was Pgeneral-t6newcentury.

## 2. Synthesis of the fiber catalysts

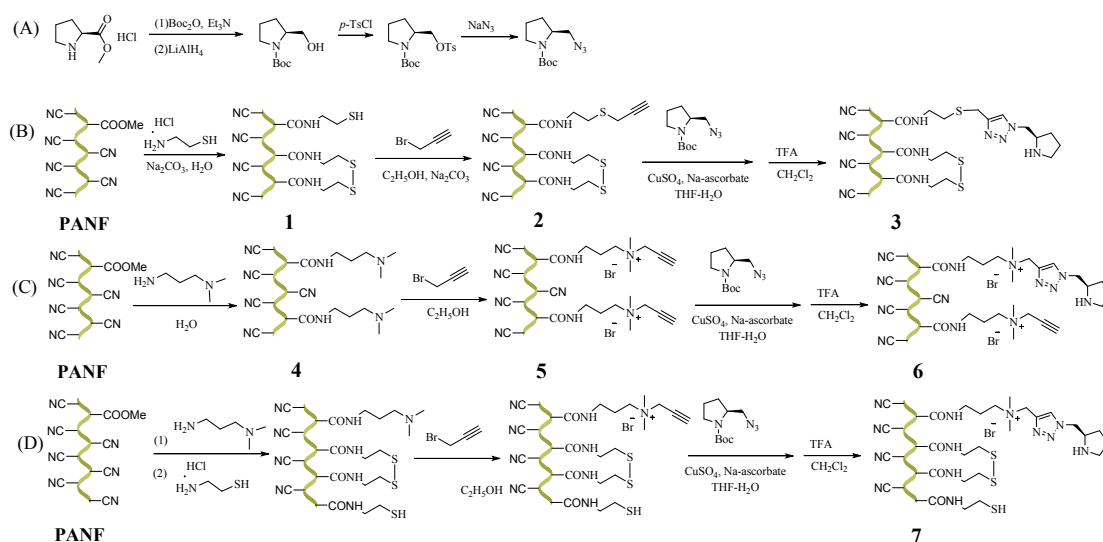

**Scheme 1.** Preparation of polyacrylonitrile fiber supported catalyst **3**, **6**, and **7**.

### (A) Synthesis of *N*-Boc-2-azidomethylpyrrolidine

***N*-Boc-(*L*)-prolinol.<sup>1</sup>** *L*-proline methyl ester hydrochloride (8.28 g, 50 mmol), Boc<sub>2</sub>O (12 g, 55 mmol) and Et<sub>3</sub>N (15.2 mL, 110 mmol) were added to 80 mL of dry CH<sub>2</sub>Cl<sub>2</sub> at 0 °C. The reaction mixture was stirred at 0 °C for 18 h, and then washed with 0.5 mol/L of HCl aqueous solution, saturated aqueous NaHCO<sub>3</sub>, and brine. The organic phase was dried over Na<sub>2</sub>SO<sub>4</sub>, filtered, concentrated in vacuo to give a colorless oil (*N*-Boc-*L*-proline methyl ester).

The above colorless oil was added to a stirred suspension of LiAlH<sub>4</sub> (1.80 g, 48.03 mmol) in THF (40 mL) at 0 °C and stirred for 3 h. Then the reaction mixture was quenched with H<sub>2</sub>O (1.8 mL), 15% aqueous NaOH (1.8 mL) and H<sub>2</sub>O (5.4 mL). The precipitate was filtered and washed with ethyl acetate (100 mL). The filtrate was concentrated under vacuo and purified by flash column chromatography (ethyl acetate/hexane, 1:5) to give *N*-Boc-(*L*)-prolinol as a liquid (9.17 g, 95%). [ $\alpha$ ]<sub>D</sub><sup>20</sup> = -33.8° (c = 1.0, CH<sub>2</sub>Cl<sub>2</sub>). <sup>1</sup>H NMR (600 MHz, CDCl<sub>3</sub>)  $\delta$  3.96 (m, 1H), 3.69-3.53 (m, 2H), 3.51-3.39 (m, 1H), 3.37-3.24 (m, 1H), 2.07-1.94 (m, 1H), 1.92-1.73 (m, 2H), 1.54 (s, 1H), 1.47 (s, 9H). <sup>13</sup>C NMR (125 MHz, CDCl<sub>3</sub>)  $\delta$  157.01, 80.12, 67.40, 60.09, 47.48, 28.61, 28.42, 24.23, 24.00.

***O*-tosyl-*N*-Boc-prolinol.<sup>2</sup>** In a 50 mL round-bottom flask, *N*-Boc-(*L*)-prolinol (604 mg, 3 mmol) was dissolved in 3 mL of pyridine, and cooled to 0 °C. Then, *p*-toluenesulfonyl chloride (696 mg, 3.6 mmol) was added and the mixture was stirred at

0 °C for 16 h. The reaction mixture was diluted with 150 mL of ethyl acetate and washed with 1 mol/L of HCl aqueous solution, saturated NaHCO<sub>3</sub> and finally with water. The organic layer was dried over Na<sub>2</sub>SO<sub>4</sub>, filtered and concentrated under reduced pressure. The obtained colourless oil was purified by flash chromatography (hexane-ethyl acetate 5:1) (704 mg, 66%).  $[\alpha]_D^{20} = -53.0^\circ$  (c = 1.0, CH<sub>2</sub>Cl<sub>2</sub>). <sup>1</sup>H NMR (600 MHz, CDCl<sub>3</sub>)  $\delta$  7.77 (d, *J* = 8.1 Hz, 2H), 7.35 (d, *J* = 7.3 Hz, 2H), 4.12-3.83 (m, 3H), 3.38-3.23 (m, 2H), 2.44 (s, 3H), 2.00-1.75 (m, 4H), 1.39 (s, 9H).

***N*-Boc-2-azidomethylpyrrolidine.**<sup>2</sup> O-tosyl-*N*-Boc-prolinol (703.5 mg, 1.98 mmol) and sodium azide (776 mg, 12 mmol) was added into 21 mL of DMSO and the resulting mixture was heated to 65 °C for 12 h. Then, it was allowed to cool to room temperature, diluted with ethyl acetate (50 mL), washed with H<sub>2</sub>O (3 × 30 mL) and brine (20 mL) and dried over Na<sub>2</sub>SO<sub>4</sub>. After removal of the ethyl acetate under reduced pressure, the *N*-Boc-2-azidomethylpyrrolidine was obtained as a colourless oil (355 mg, 80%).  $[\alpha]_D^{20} = -57.8^\circ$  (c = 1.0, CH<sub>2</sub>Cl<sub>2</sub>). <sup>1</sup>H NMR (600 MHz, CDCl<sub>3</sub>)  $\delta$  3.91 (m, 1H), 3.63-3.24 (m, 4H), 2.05-1.76 (m, 4H), 1.47 (s, 9H).

## **(B) Synthesis of catalyst 3**

### **Fiber 1.**

Dried **PANF** (1.000 g), cysteamine hydrochloride (1.36 g), deionized water (15 mL) and Na<sub>2</sub>CO<sub>3</sub> (1.27 g) were added to a three-necked flask. The mixture was stirred and refluxed for 5 h. The treated fiber was filtered out and washed with 0.2 mol/L of HCl solution and then hot water (60-70 °C) until neutral. It was then dried overnight at 60 °C under vacuum to give the modified fiber **1**. The weight gain of fiber **1** based on **PANF** was 23%.

### **Fiber 2**

Dried fiber **1** (1.000 g, 2.43 mmol/g cysteamine functions calculated by the weight gain), 3-bromopropyne (9.2 mmol), Na<sub>2</sub>CO<sub>3</sub> (0.254 g) and 30 mL of ethanol were added to a three-necked flask. The mixture was stirred and heated at reflux for 6 h. The modified fiber was filtered out and washed with ethanol, 0.2 mol/L of HCl solution and hot water (60-70 °C) until neutral. The fiber was then dried overnight at

60 °C under vacuum to give the fiber **2** with an alkynyl functionality of 0.93 mmol/g.

### **Catalyst 3<sup>3</sup>**

Fiber **2** (1.000 g), *N*-*boc*-2-azidomethylpyrrolidine (454 mg, 2 mmol), sodium ascorbate (118 mg, 0.6 mmol) and CuSO<sub>4</sub>·5H<sub>2</sub>O (75 mg, 0.3 mmol) were added to a solution of THF:H<sub>2</sub>O=3:1 (35 mL) at room temperature for 24 h. Then the fiber was filtered and directly added to a mixture of CH<sub>2</sub>Cl<sub>2</sub>:TFA (trifluoroacetic acid) = 1:1 (30 mL) at room temperature for 12 h. After filtration, the fiber was added to a mixture of Et<sub>3</sub>N:THF=2:98 (30 mL) for 1h. Then the catalyst **3** was sequentially washed with THF (with 2 % of Et<sub>3</sub>N, 250 mL), water (250 mL), MeOH (250 mL). The weight gain of catalyst **3** based on fiber **2** was 5.5 % (0.46 mmol/g of chiral pyrrolidinyl groups). The loadings of disulfide bond, alkynyl, and chiral pyrrolidinyl groups of catalyst **3** are 0.66 mmol/g, 0.42 mmol/g, and 0.46mmol/g, respectively.

### **(C) Synthesis of catalyst 6**

#### **Aminated fiber 4.**

Dried **PANF** (5.000 g), *N,N*-dimethyl-1,3-propanediamine (70 mL) and deionized water (30 mL) were added to a three-necked flask. The mixture was stirred and heated at reflux for 280 min. The treated fiber was filtered out and repeatedly washed with hot water (60-70 °C) until neutral. It was then dried overnight at 60 °C under vacuum to give the tertiary amine aminated fiber **4**. The weight gain of fiber **4** based on **PANF** was 24.0% (2.29 mmol/g tertiary amine functions calculated by weight gain and acid exchange capacity).<sup>4</sup>

#### **Quaternized fiber 5.**

Dried aminated fiber **4** (1.000 g), 3-bromopropyne (9.2 mmol) and 30 mL of ethanol were added to a three-necked flask. The mixture was stirred and heated at reflux for 5 h. The modified fiber was filtered out and washed with ethanol and deionized water. The fiber was then dried overnight at 60 °C under vacuum to give the fiber **5** with an alkynyl functionality of 1.57 mmol/g.

### **Catalyst 6**

Quaternized fiber **5** (1.000 g), *N*-*boc*-2-azidomethylpyrrolidine (454 mg, 2 mmol),

sodium ascorbate (118 mg, 0.6 mmol) and  $\text{CuSO}_4 \cdot 5\text{H}_2\text{O}$  (75 mg, 0.3 mmol) were added to a solution of THF:H<sub>2</sub>O=3:1 (35 mL) at room temperature for 24 h. Then the fiber was filtered and directly added to a mixture of  $\text{CH}_2\text{Cl}_2$ :TFA (trifluoroacetic acid)=1:1 (30 mL) at room temperature for 12 h. After filtration, the fiber was added to a mixture of  $\text{Et}_3\text{N}$ :THF=2:98 (30 mL) for 1h. Then the catalyst **3** was sequentially washed with THF (containing 2 % of  $\text{Et}_3\text{N}$ , 250 mL), water (250 mL), MeOH (250 mL). The weight gain of catalyst **6** based on fiber **5** was 6.8% (0.58 mmol/g of chiral pyrrolidinyl groups). The loadings of tertiary amine, alkynyl, and chiral pyrrolidinyl group of catalyst **6** are 0.28 mmol/g, 0.89 mmol/g, and 0.58 mmol/g, respectively.

#### (D) Synthesis of catalyst **7**

Dried fiber **4** (1.000 g), cysteamine hydrochloride (1.13 g), deionized water (15 mL) and  $\text{Na}_2\text{CO}_3$  (1.07 g) were added to a three-necked flask. The mixture was stirred and refluxed for 3 h. The treated fiber was filtered out and washed with 0.2 mol/L of HCl solution, 0.2 mol/L of  $\text{NEt}_3$  aqueous solution, and hot water (60-70 °C) until neutral. It was then dried overnight at 60 °C under vacuum to give the bi-functional fiber. The weight gain of bi-functional fiber based on fiber **4** was 13% (1.49 mmol/g).

The bi-functional fiber (1.000 g), 3-bromopropyne (9.2 mmol) and 30 mL of ethanol were added to a three-necked flask. The mixture was stirred and heated at reflux for 5 h. The modified fiber was filtered out and washed with ethanol and deionized water. The fiber was then dried overnight at 60 °C under vacuum to give the quaternization bi-functional fiber with an alkynyl functionality of 1.52 mmol/g. Then the fiber cycloaddition with *N*-*boc*-2-azidomethyl pyrrolidine, and deprotection with trifluoroacetic acid (TFA) to afford catalyst **7** (0.54 mmol/g). The loadings of thiol, disulfide bond, tertiary amine, alkynyl, and chiral pyrrolidinyl groups of catalyst **7** are 0.44 mmol/g, 0.36 mmol/g, 0.30 mmol/g, 0.89 mmol/g, and 0.54 mmol/g, respectively.

For the quaternization process, the 3-bromopropyne can only reacted with tertiary amine group. Because the quaternization between tertiary amine and 3-bromopropyne can be easily occurred without extra base. However, the reaction between thiol and 3-

bromopropyne must use adequate amount of  $\text{Na}_2\text{CO}_3$  to neutralize the thiol to form thiol anion which was much easier to react with 3-bromopropyne. Therefore, without addition of  $\text{Na}_2\text{CO}_3$ , the 3-bromopropyne can only reacted with tertiary amine group.

### 3. The determination of disulfide formation

The disulfide formation was determined by Ellman reagent.

Method:

1. Prepare 10 mmol/L DTNB (5,5'-dithiobis-(2-nitrobenzoic acid) stock solution by dissolving 40 mg DTNB in 10 mL DMSO. Dilute the stock solution 100 fold with 0.1 mol/L Tris-HCl pH 7.5 to make 0.1 mmol/L DTNB working solution.
2. A series of DTT (DL-Dithiothreitol) (starting at 0.1 mmol/L) was prepared. 10 mL of DTT standard solutions and 10 mL of 0.1mM DTNB were mixed . A standard SH calibration curve was set up by UV spectrophotometer (UV wavelength 412 nm).
3. Sample 1: Appropriate amount of fiber **1** (**3** and **7**) was added to 10 mL of 0.1mmol/L DTNB working solution at 30 °C for 2 h. The filtrates of samples 1 was determined by UV spectrophotometer.

Sample 2: Appropriate amount of fiber **1** (**3** and **7**) was added to a mixture of 10 mL (0.063 mmol/L) of TCEP (tris(2-carboxyethyl)phosphine) stirred at 30 °C for 2 h. Then 10 mL of 0.1 mmol/L DTNB working solution was added and stirred at 30 °C for 2 h. The filtrate of samples 2 was determined by UV spectrophotometer. The results were list in Table 1.

**Table 1.** The preparation of standard S-H calibration curve.

| Entry            | 1     | 2     | 3     | 4     | 5     |
|------------------|-------|-------|-------|-------|-------|
| C ( $10^{-5}$ M) | 0.25  | 0.5   | 2     | 3.5   | 5     |
| A                | 0.055 | 0.110 | 0.541 | 0.920 | 1.266 |

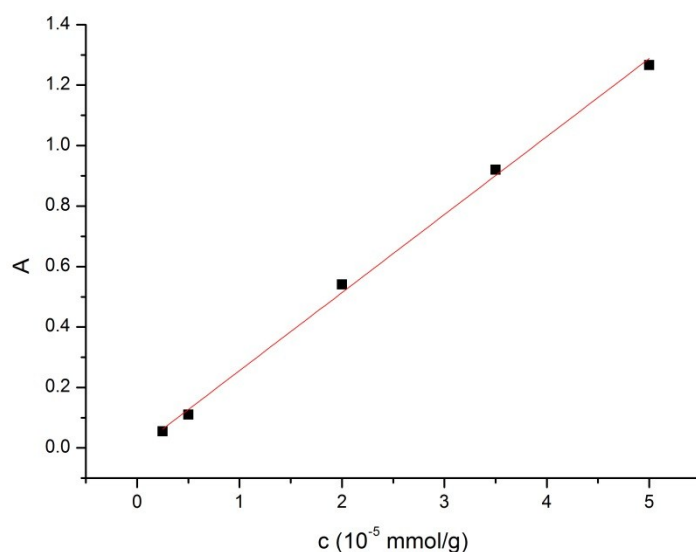

Results:

**Table 2.** the functional groups of free thiol and S-S bond.

|                     | Fiber <b>1</b> | Catalyst <b>3</b> | Catalyst <b>7</b> |
|---------------------|----------------|-------------------|-------------------|
| Free thiol (mmol/g) | 0.97           | 0.00              | 0.44              |
| S-S bond (mmol/g)   | 0.73           | 0.66              | 0.36              |

#### 4. Typical procedure for the Michael reaction

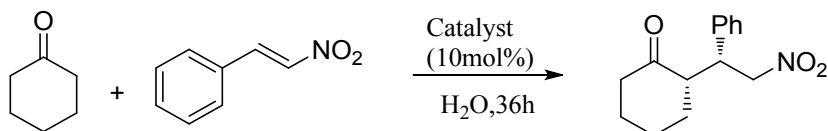

*Trans*- $\beta$ -nitrostyrene (120 mg, 0.8 mmol), cyclohexanone (1.5 mL, 16 mmol), catalyst **6** (0.14 g, 10 mol %) and 9 mol% *p*-toluenesulfonic acid were added to 20 mL of water. The suspension was stirred at 20 °C for 36 h and then directly filtered. The fiber washed with water and the organic filtrate was concentrated under reduced pressure. Its  $^1\text{H}$  NMR spectrum was integrated to calculate the diastereomeric ratio (syn/anti = 97:3) and the product was purified by flash chromatography on silica gel (EtOAc/Hexane) to afford the syn Michael adduct (164 mg, 83%) as a white solid. The enantiomeric excess was determined by HPLC on a chiral phase chiralpak AD-H column (99% ee).

#### 5. The BET surfaces of fiber catalyst

**Table 3.** The BET surfaces of PANF, catalyst **3**, **6**, and **7**.



|                                 | PANF | Catalyst 3 | Catalyst 6 | Catalyst 7 |
|---------------------------------|------|------------|------------|------------|
| BET surface (m <sup>2</sup> /g) | 43   | 48         | 44         | 52         |

The BET surfaces of PANF, catalyst **3**, **6**, and **7** are 43 m<sup>2</sup>/g, 48 m<sup>2</sup>/g, 44 m<sup>2</sup>/g, and 52 m<sup>2</sup>/g, respectively. The results showed that the modified catalysts **3**, **6**, and **7** have similar surface areas to PANF, demonstrating that the surface areas change slightly after the modification and the high catalytic activities of the catalyst suggest that the reaction performed beneath the surface of the modified fiber .

## 6. The absorption capacity of catalyst 6 for reactants

*Trans*- $\beta$ -nitrostyrene (120 mg, 0.8 mmol), cyclohexanone (1.5 mL, 16 mmol), and catalyst **6** (0.14 g, 10 mol %) were added to 20 mL of water and stirred at 20 °C for 1 h. The fibers was directly filtered and washed with water. The absorption capacities of *trans*- $\beta$ -nitrostyrene and cyclohexanone were characterized by HPLC and GC using phenol as internal standard. Finally, the absorption capacity of catalyst **6** for *trans*- $\beta$ -nitrostyrene is 1.58 mmol/g and the absorption capacity for cyclohexanone is 11.20 mmol/g under the optimized condition.

## 7. The time-on-stream of the flow system

The flow system was consisted of a 13 cm silica column between flask and peristaltic pump. The silica column packed with 210 mg of catalyst **6** (0.48 mmol/g) which was kept at 20 °C in thermostatic bath. A solution of *trans*- $\beta$ -nitrostyrene (447 mg, 3 mmol), cyclohexanone (3 mL), and 20 mg *p*-toluenesulfonic acid in 30 mL of ethanol and 30 mL of water was pumped into the system at 0.028 mL/min. Both the conversion and enantiomeric ratio of the final product were determined by HPLC analysis of periodically collected samples using naphthalene as internal standard. The experiment was run for 36 h and samples were collected every 3 hours from 3 h to 36 h. The result was listed in Table 4.

**Table 4.** The result of time-on-stream of the flow system.

| Time (h) | Conversion (%) | Ee (%) | Time (h) | Conversion (%) | Ee % |
|----------|----------------|--------|----------|----------------|------|
| 3        | 62             | 98     | 21       | 69             | 99   |
| 6        | 70             | 99     | 24       | 62             | 99   |

|    |    |    |    |    |    |
|----|----|----|----|----|----|
| 9  | 76 | 99 | 27 | 60 | 98 |
| 12 | 71 | 99 | 30 | 58 | 98 |
| 15 | 58 | 98 | 33 | 62 | 99 |
| 18 | 60 | 99 | 36 | 60 | 98 |

## 8. Spectroscopic and chromatographic data for Michael adducts

### (*S*)-2-[(*R*)-2-Nitro-1-phenylethyl]cyclohexanone<sup>2</sup> (entry 1, Table 3):

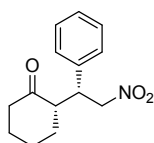

$[\alpha]_D^{20} = -22.4^\circ$  (99% ee,  $c = 1.0$ ,  $\text{CH}_2\text{Cl}_2$ ).  $^1\text{H}$  NMR (600 MHz,  $\text{CDCl}_3$ )  $\delta$  7.35-7.23 (m, 3H), 7.17 (d,  $J = 7.5$  Hz, 2H), 4.94 (dd,  $J = 12.5, 4.5$  Hz, 1H), 4.63 (m, 1H), 3.76 (td,  $J = 9.9, 4.5$  Hz, 1H), 2.75-2.64 (m, 1H), 2.53-2.43 (m, 1H), 2.38 (m,  $J = 12.5, 6.0$  Hz, 1H), 2.12-2.02 (m, 1H), 1.81-1.51 (m, 4H), 1.23 (m, 1H). The enantiomeric excess was determined by HPLC with Chiralpak AD-H column at 208 nm (hexane: 2-propanol = 90:10, 1  $\text{mL} \cdot \text{min}^{-1}$ ):  $t_R = 11.2$  min (minor), 14.6 min (major).

### (*S*)-2-[(*R*)-2-Nitro-1-(4-nitrophenyl)ethyl]cyclohexanone<sup>5</sup> (entry 2, Table 3):

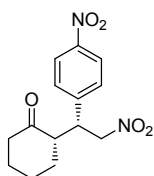

$[\alpha]_D^{20} = -10.4^\circ$  (91% ee,  $c = 1.0$ ,  $\text{CH}_2\text{Cl}_2$ ).  $^1\text{H}$  NMR (600 MHz,  $\text{CDCl}_3$ )  $\delta$  8.20 (d,  $J = 8.1$  Hz, 2H), 7.40 (d,  $J = 8.5$  Hz, 2H), 5.00 (dd,  $J = 13.0, 4.3$  Hz, 1H), 4.81-4.60 (m, 1H), 3.94 (td,  $J = 9.7, 4.3$  Hz, 1H), 2.78-2.66 (m, 1H), 2.50 (d,  $J = 12.9$  Hz, 1H), 2.38 (ddd,  $J = 27.1, 16.7, 5.8$  Hz, 1H), 2.11 (m, 1H), 1.81 (t,  $J = 23.5$  Hz, 1H), 1.76-1.52 (m, 3H), 1.33-1.20 (m, 1H). The enantiomeric excess was determined by HPLC with Chiralpak AD-H column at 208 nm (hexane: 2-propanol = 90:10, 2  $\text{mL} \cdot \text{min}^{-1}$ ):  $t_R = 15.8$  min (minor), 20.7 min (major).

### (*S*)-2-[(*R*)-1-(4-Fluorophenyl)-2-nitroethyl]cyclohexanone<sup>5</sup> (entry 3, Table 3):

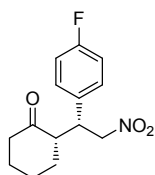

$[\alpha]_{\text{D}}^{20} = -15.2^{\circ}$  (91% ee,  $c = 1.0$ ,  $\text{CH}_2\text{Cl}_2$ ).  $^1\text{H}$  NMR (600 MHz,  $\text{CDCl}_3$ )  $\delta$  7.21-7.11 (m, 2H), 7.09-6.97 (m, 2H), 4.93 (dd,  $J = 12.5, 4.3$  Hz, 1H), 4.68-4.54 (m, 1H), 3.77 (s, 1H), 2.77-2.58 (m, 1H), 2.58-2.26 (m, 2H), 2.09 (m, 1H), 1.90-1.52 (m, 4H), 1.37-1.13 (m, 1H). The enantiomeric excess was determined by HPLC with Chiralpak AD-H column at 208 nm (hexane: 2-propanol = 90:10, 1  $\text{mL} \cdot \text{min}^{-1}$ ):  $t_{\text{R}} = 9.4$  min (minor), 12.1 min (major).

**(S)-2-[(R)-1-(4-Chlorophenyl)-2-nitroethyl]cyclohexanone<sup>5</sup> (entry 4, Table 3)**

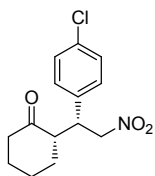

$[\alpha]_{\text{D}}^{20} = -14.8^{\circ}$  (94% ee,  $c = 1.0$ ,  $\text{CH}_2\text{Cl}_2$ ).  $^1\text{H}$  NMR (600 MHz,  $\text{CDCl}_3$ )  $\delta$  7.30 (d,  $J = 8.1$  Hz, 2H), 7.12 (d,  $J = 8.3$  Hz, 2H), 4.94 (dd,  $J = 12.6, 4.5$  Hz, 1H), 4.60 (m, 1H), 3.76 (td,  $J = 9.9, 4.4$  Hz, 1H), 2.74-2.61 (m, 1H), 2.47 (d,  $J = 12.8$  Hz, 1H), 2.42-2.28 (m, 1H), 2.15-2.04 (m, 1H), 1.88-1.53 (m, 4H), 1.38-1.15 (m, 1H). The enantiomeric excess was determined by HPLC with Chiralpak AD-H column at 208 nm (hexane: 2-propanol = 90:10, 1.5  $\text{mL} \cdot \text{min}^{-1}$ ):  $t_{\text{R}} = 5.3$  min (minor), 5.9 min (major).

**(S)-2-[(R)-1-(4-Bromophenyl)-2-nitroethyl]cyclohexanone<sup>5</sup> (entry 5, Table 3):**

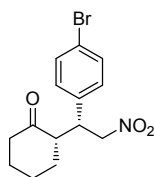

$[\alpha]_{\text{D}}^{20} = -12.2^{\circ}$  (91% ee,  $c = 1.0$ ,  $\text{CH}_2\text{Cl}_2$ ).  $^1\text{H}$  NMR (600 MHz,  $\text{CDCl}_3$ )  $\delta$  7.30 (d,  $J = 8.2$  Hz, 2H), 7.12 (d,  $J = 8.3$  Hz, 2H), 4.94 (dd,  $J = 12.6, 4.5$  Hz, 1H), 4.63-4.57 (m, 1H), 3.76 (td,  $J = 9.9, 4.4$  Hz, 1H), 2.73-2.60 (m, 1H), 2.47 (d,  $J = 13.0$  Hz, 1H), 2.42-2.27 (m, 1H), 2.08 (dt,  $J = 22.3, 11.4$  Hz, 1H), 1.84-1.52 (m, 4H), 1.35-1.14 (m, 1H). The enantiomeric excess was determined by HPLC with Chiralpak AD-H column at 208 nm (hexane: 2-propanol = 90:10, 1.0  $\text{mL} \cdot \text{min}^{-1}$ ):  $t_{\text{R}} = 11.1$  min (minor), 14.5 min (major).

**(S)-2-[(R)-2-Nitro-1-(3-phenoxyphenyl)ethyl]cyclohexanone (entry 6, Table 3)**

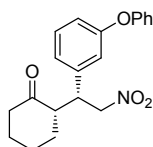

$[\alpha]_D^{20} = -9.4^\circ$  (85% ee,  $c = 1.0$ ,  $\text{CH}_2\text{Cl}_2$ ).  $^1\text{H}$  NMR (600 MHz,  $\text{CDCl}_3$ )  $\delta$  7.34 (m, 2H), 7.26 (m, 1H), 7.11 (m, 1H), 7.00-6.96 (m, 2H), 6.89 (m, 3H), 4.93 (dd,  $J = 12.5, 4.4$  Hz, 1H), 4.62-4.54 (m, 1H), 3.73 (td,  $J = 10.0, 4.4$  Hz, 1H), 2.63 (td,  $J = 11.5, 4.9$  Hz, 1H), 2.46 (d,  $J = 12.9$  Hz, 1H), 2.41-2.28 (m, 1H), 2.16-2.02 (m, 1H), 1.86-1.53 (m, 4H), 1.37-1.13 (m, 1H).  $^{13}\text{C}$  NMR (151 MHz,  $\text{CDCl}_3$ )  $\delta$  211.75, 157.60, 156.87, 139.80, 130.28, 129.86, 123.50, 123.13, 118.86, 118.55, 118.02, 78.77, 52.42, 43.86, 42.77, 33.28, 28.82, 28.55, 25.47, 25.08. The enantiomeric excess was determined by HPLC with Chiralpak AD-H column at 208 nm (hexane: 2-propanol = 90:10,  $1.0 \text{ mL} \cdot \text{min}^{-1}$ ):  $t_R = 10.1$  min (minor), 15.8 min (major).

**(S)-2-[(R)-2-Nitroethyl-1-(4-tolyl)]cyclohexanone<sup>5</sup> (entry 7, Table 3):**

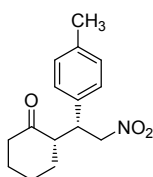

$[\alpha]_D^{20} = -12.0^\circ$  (87% ee,  $c = 1.0$ ,  $\text{CH}_2\text{Cl}_2$ ).  $^1\text{H}$  NMR (600 MHz,  $\text{CDCl}_3$ )  $\delta$  7.12 (d,  $J = 7.8$  Hz, 2H), 7.05 (d,  $J = 7.9$  Hz, 2H), 4.96-4.88 (m, 1H), 4.65-4.56 (m, 1H), 3.74 (dt,  $J = 14.4, 9.9, 4.5$  Hz, 1H), 2.66 (td,  $J = 11.3, 5.0$  Hz, 1H), 2.47 (dd,  $J = 9.6, 3.3$  Hz, 1H), 2.42-2.34 (m, 1H), 2.31 (s, 3H), 2.12-2.03 (m, 1H), 1.81-1.53 (m, 4H), 1.31-1.15 (m, 1H). The enantiomeric excess was determined by HPLC with Chiralpak AD-H column at 208 nm (hexane: 2-propanol = 90:10,  $1.0 \text{ mL} \cdot \text{min}^{-1}$ ):  $t_R = 13.3$  min (minor), 20.3 min (major).

**(S)-2-[(R)-1-(2-Chlorophenyl)-2-nitroethyl] cyclohexanone<sup>6</sup> (entry 8, Table 3)**

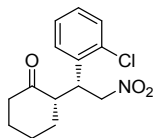

$[\alpha]_D^{20} = -34.2^\circ$  (90% ee,  $c = 1.0$ ,  $\text{CH}_2\text{Cl}_2$ ).  $^1\text{H}$  NMR (600 MHz,  $\text{CDCl}_3$ )  $\delta$  7.38 (d,  $J = 7.5$  Hz, 1H), 7.26-7.18 (m, 3H), 4.92-4.89 (m, 2H), 4.29 (d,  $J = 4.9$  Hz, 1H), 2.92 (s, 1H), 2.48 (d,  $J = 12.9$  Hz, 1H), 2.39 (td,  $J = 12.9, 6.0$  Hz, 1H), 2.17-2.06 (m, 1H), 1.86-1.53 (m, 4H), 1.41-1.27 (m, 1H). The enantiomeric excess was

determined by HPLC with Chiralpak AD-H column at 208 nm (hexane: 2-propanol = 90:10, 1.0 mL·min<sup>-1</sup>): *t<sub>R</sub>* = 8.5 min (minor), 10.6 min (major).

**(*S*)-2-((*R*)-1-(4-Methoxyphenyl)-2-nitroethyl)cyclohexanone<sup>2</sup> (entry 9, Table 3)**

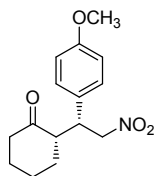

$[\alpha]_{\text{D}}^{20} = -14.2^{\circ}$  (93% ee, *c* = 1.0, CH<sub>2</sub>Cl<sub>2</sub>). <sup>1</sup>H NMR (600 MHz, CDCl<sub>3</sub>)  $\delta$  6.83 (d, *J* = 8.5 Hz, 2H), 6.41 (d, *J* = 13.1 Hz, 2H), 5.86 (dd, *J* = 15.7, 9.6 Hz, 1H), 4.59-4.51 (m, 1H), 3.80 (s, 3H), 3.31 (qd, *J* = 8.6, 4.9 Hz, 1H), 2.57-2.48 (m, 1H), 2.43 (t, *J* = 16.0 Hz, 1H), 2.35 (m, 1H), 2.17 (d, *J* = 13.7 Hz, 1H), 2.08 (dd, *J* = 18.8, 14.8 Hz, 1H), 1.90 (d, *J* = 5.0 Hz, 1H), 1.73-1.60 (m, 2H), 1.45 (dt, *J* = 21.6, 10.7 Hz, 1H). The enantiomeric excess was determined by HPLC with Chiralpak AD-H column at 208 nm (hexane: 2-propanol = 90:10, 1.0 mL·min<sup>-1</sup>): *t<sub>R</sub>* = 10.9 min (minor), 13.6 min (major).

**(*S*)-2-[(*R*)-1-(2-Furanyl)-2-nitroethyl]cyclohexanone<sup>5</sup> (entry 10, Table 3):**

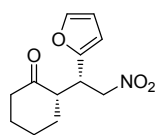

$[\alpha]_{\text{D}}^{20} = -7.4^{\circ}$  (83% ee, *c* = 1.0, CH<sub>2</sub>Cl<sub>2</sub>). <sup>1</sup>H NMR (600 MHz, CDCl<sub>3</sub>)  $\delta$  7.34 (d, *J* = 10.8 Hz, 1H), 6.29 (s, 1H), 6.18 (d, *J* = 2.9 Hz, 1H), 4.79 (dd, *J* = 12.5, 4.7 Hz, 1H), 4.67 (dd, *J* = 12.2, 9.7 Hz, 1H), 3.97 (td, *J* = 9.2, 4.7 Hz, 1H), 2.82-2.70 (m, 1H), 2.45 (t, *J* = 17.8 Hz, 1H), 2.37 (td, *J* = 12.8, 6.2 Hz, 1H), 2.07 (d, *J* = 33.2 Hz, 1H), 1.90-1.58 (m, 4H), 1.41-1.21 (m, 1H). The enantiomeric excess was determined by HPLC with Chiralpak AD-H column at 208 nm (hexane: 2-propanol = 90:10, 1.0 mL·min<sup>-1</sup>): *t<sub>R</sub>* = 11.1 min (major), 13.5 min (minor).

**(*S*)-2-[(*R*)-1-(1-Naphthyl)-2-nitroethyl]cyclohexanone<sup>7</sup> (entry 11, Table 3)**

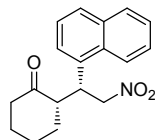

$[\alpha]_{\text{D}}^{20} = -14.0^{\circ}$  (84% ee, *c* = 1.0, CH<sub>2</sub>Cl<sub>2</sub>). <sup>1</sup>H NMR (600 MHz, CDCl<sub>3</sub>)  $\delta$  7.81 (m, 3H), 7.63 (s, 1H), 7.57-7.44 (m, 2H), 7.29 (m, 1H), 5.02 (dd, *J* = 12.6, 4.4 Hz, 1H), 4.87-4.67 (m, 1H), 3.95 (td, *J* = 10.0, 4.4 Hz, 1H), 2.86-2.73 (m, 1H), 2.50 (d, *J* = 13.0 Hz, 1H), 2.40 (td, *J* = 12.9, 6.0 Hz, 1H), 2.08 (dd, *J* = 21.6, 15.2

Hz, 1H), 1.81-1.50 (m, 4H), 1.32-1.20 (m, 1H). The enantiomeric excess was determined by HPLC with Chiralpak AD-H column at 208 nm (hexane: 2-propanol = 90:10, 1.0 mL·min<sup>-1</sup>): t<sub>R</sub> = 12.7 min (minor), 17.6 min (major).

## 9. NMR and HPLC spectra for Michael adducts

### (A) NMR spectra

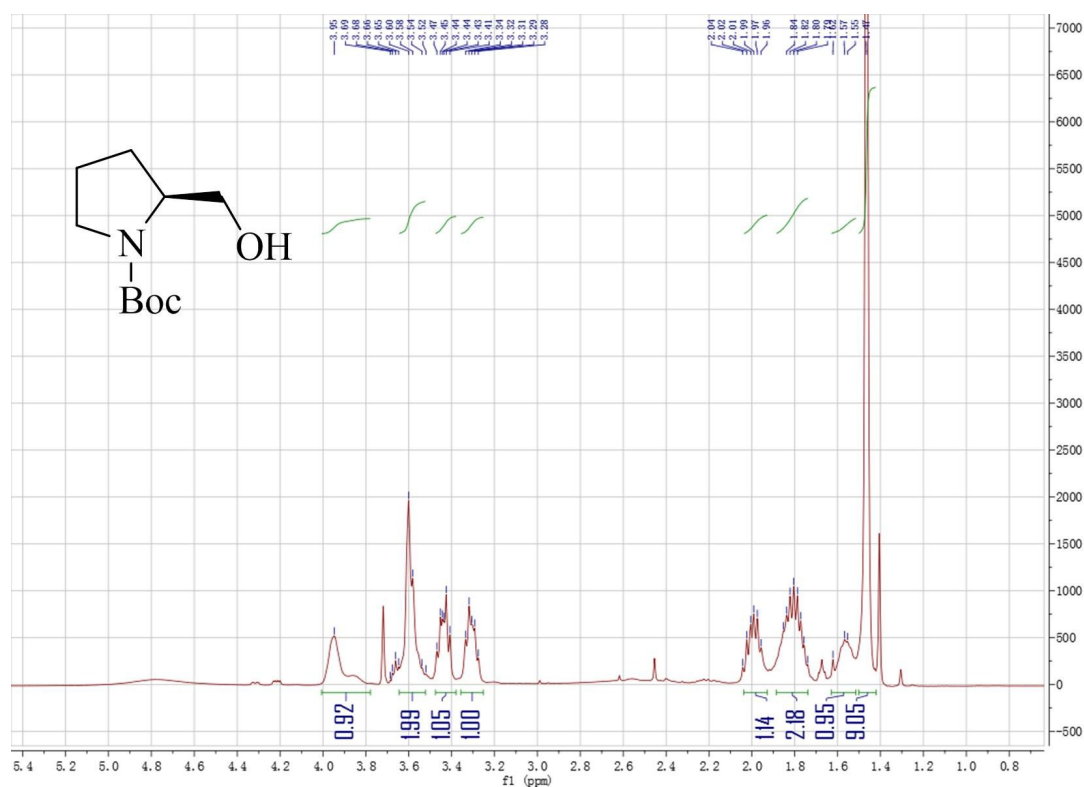

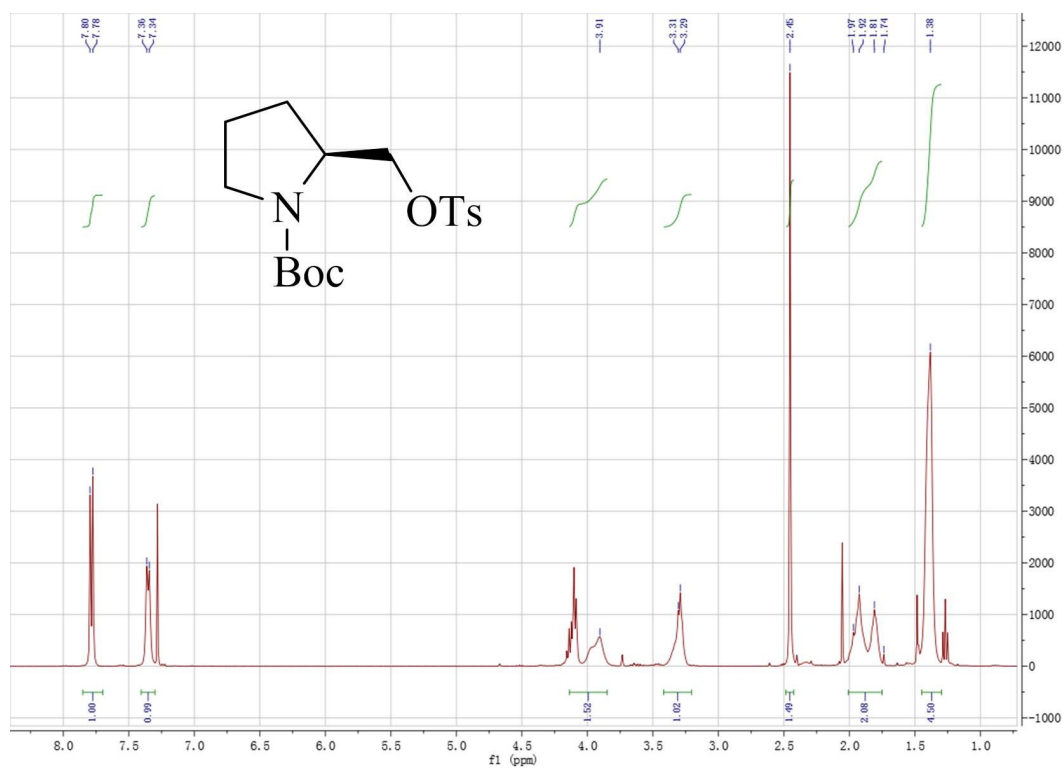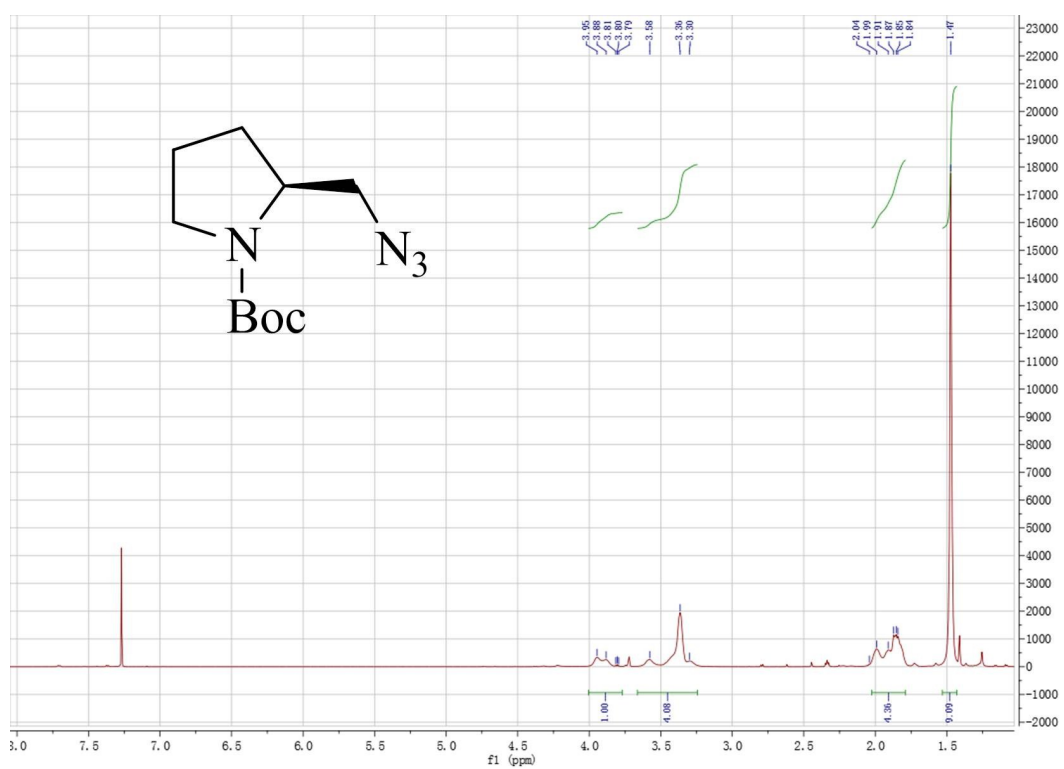

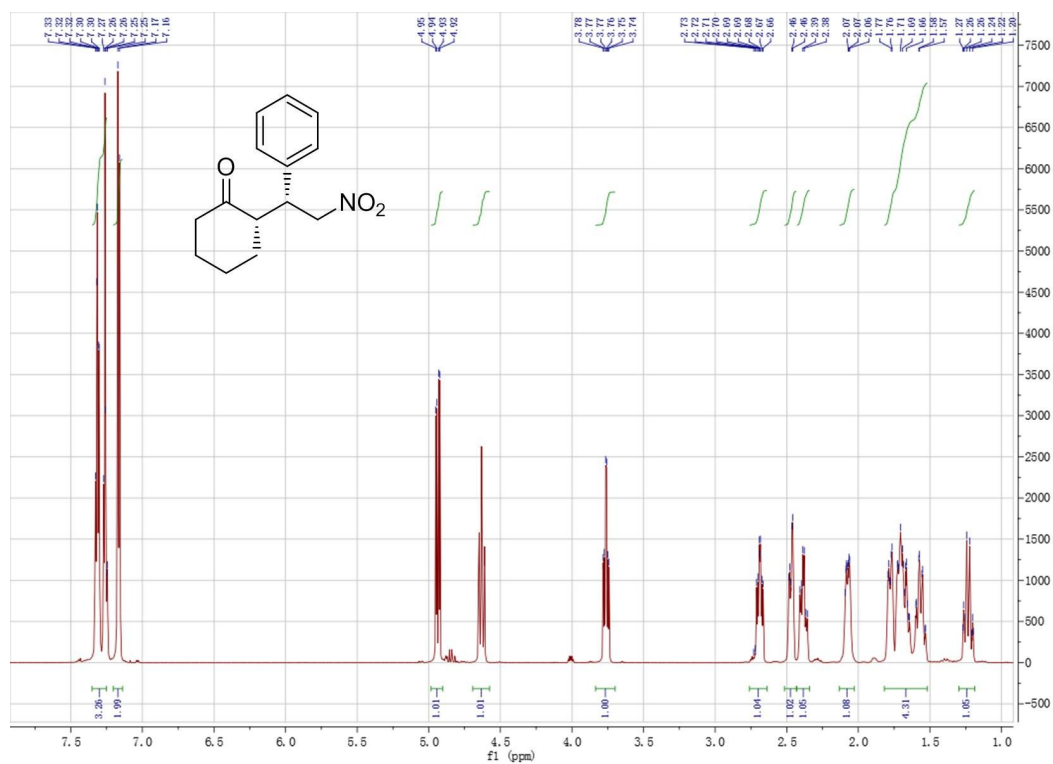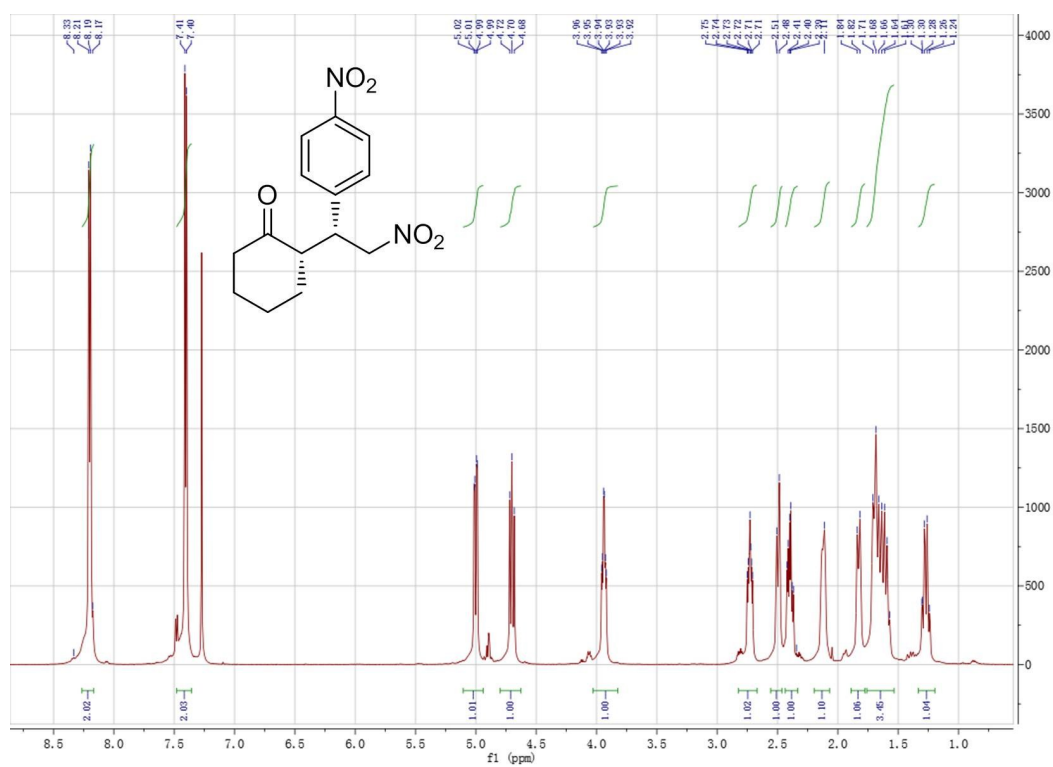



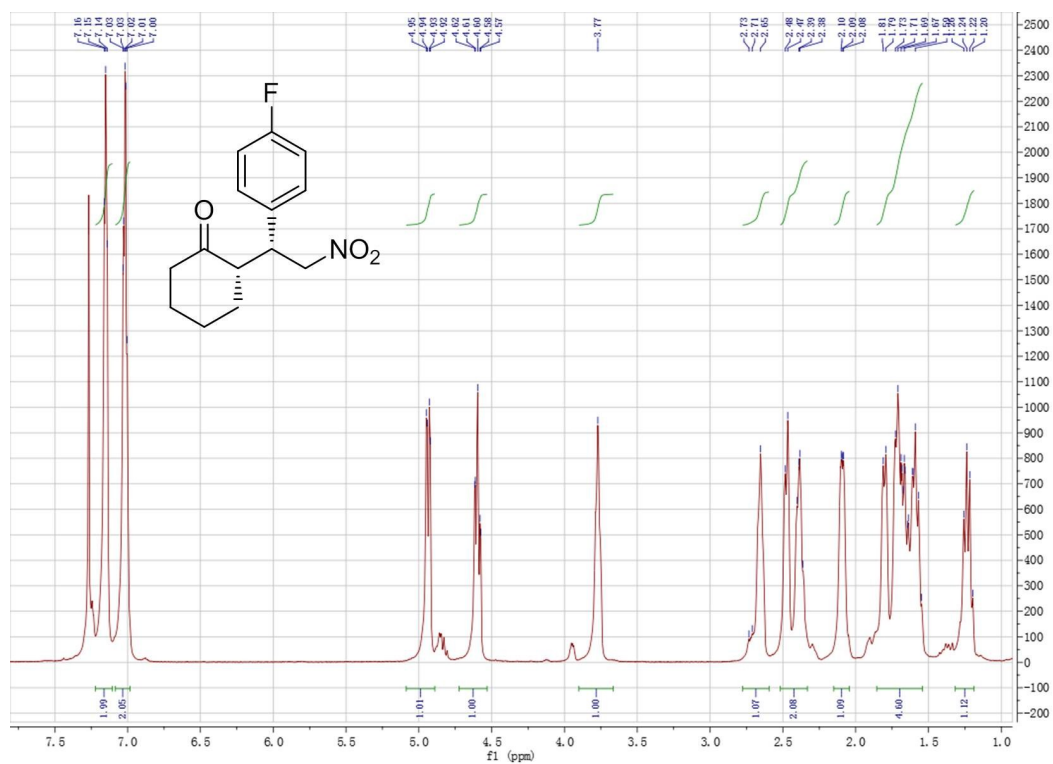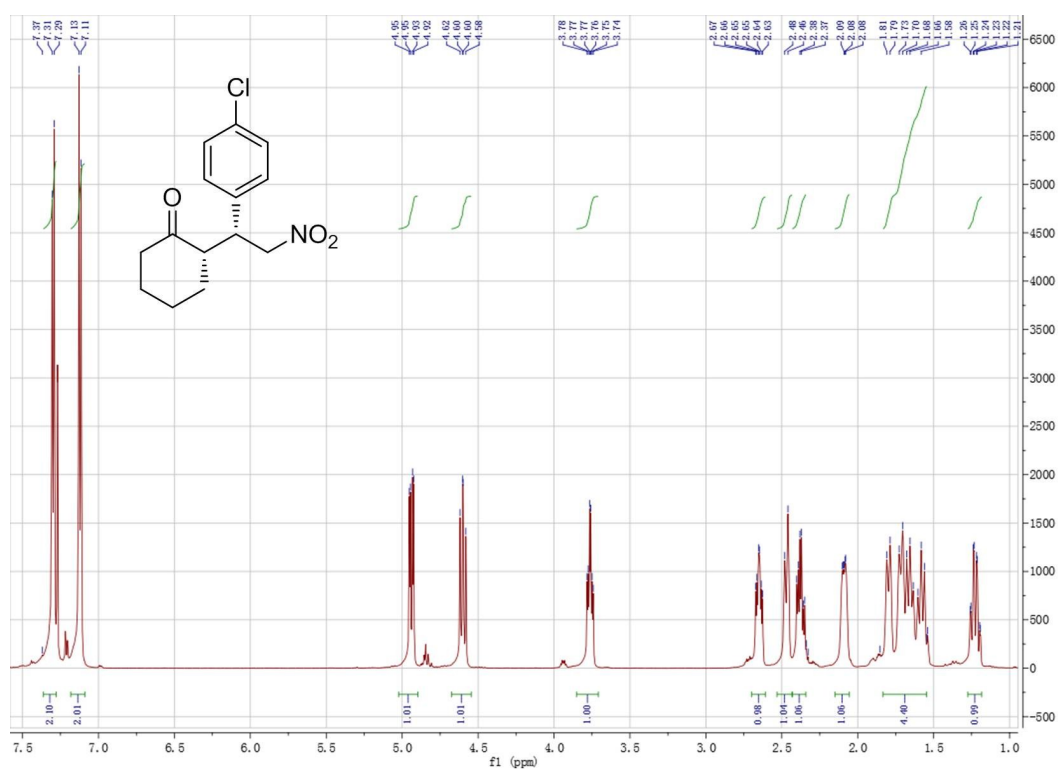

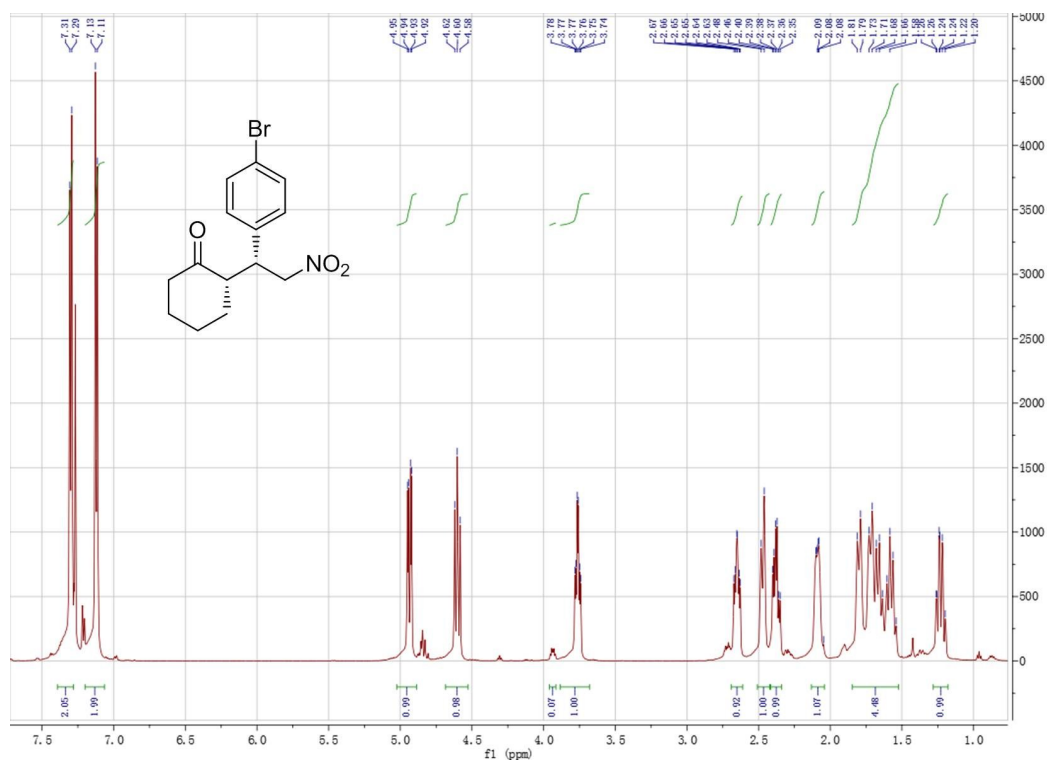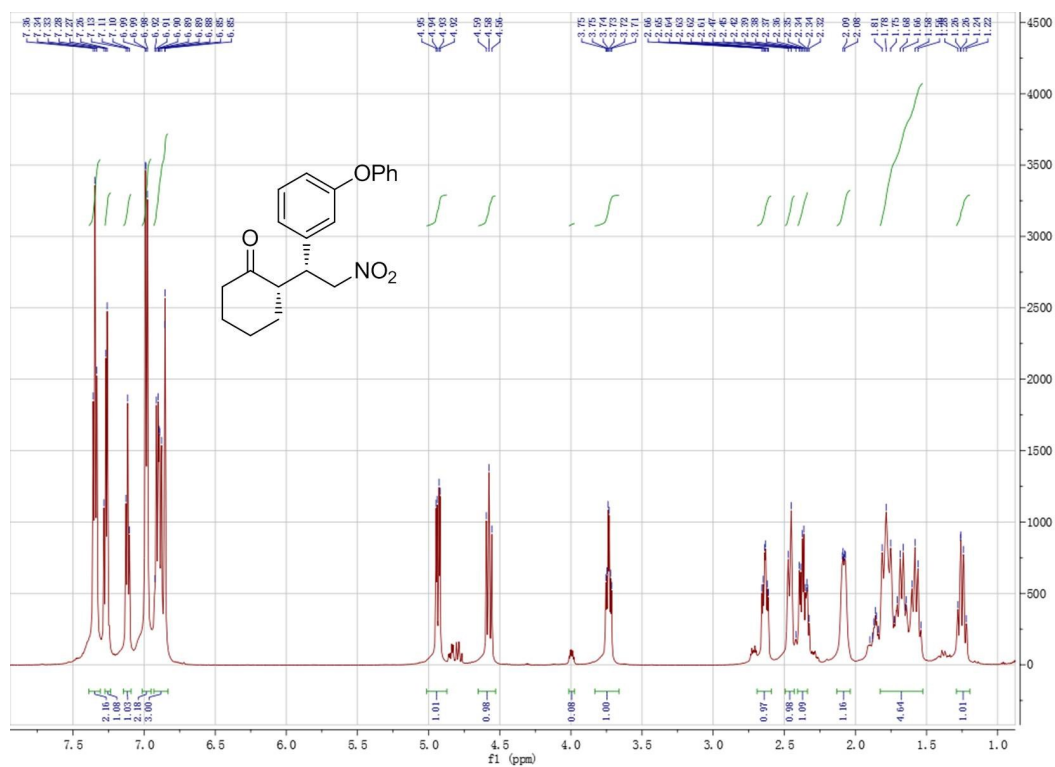

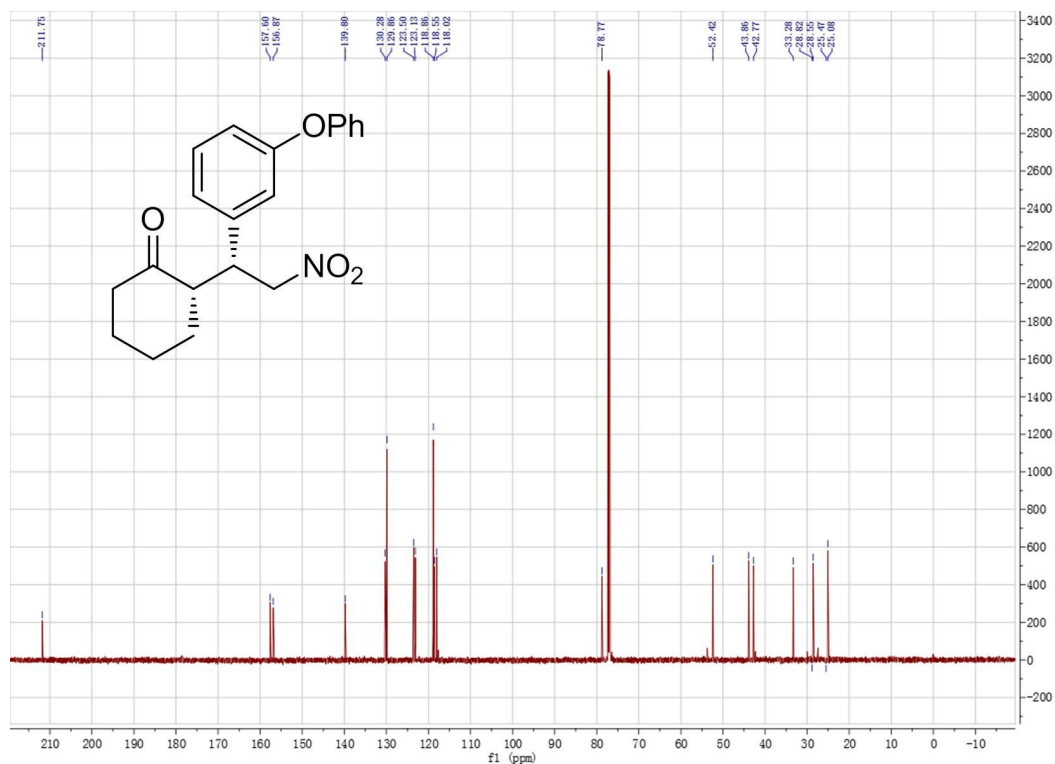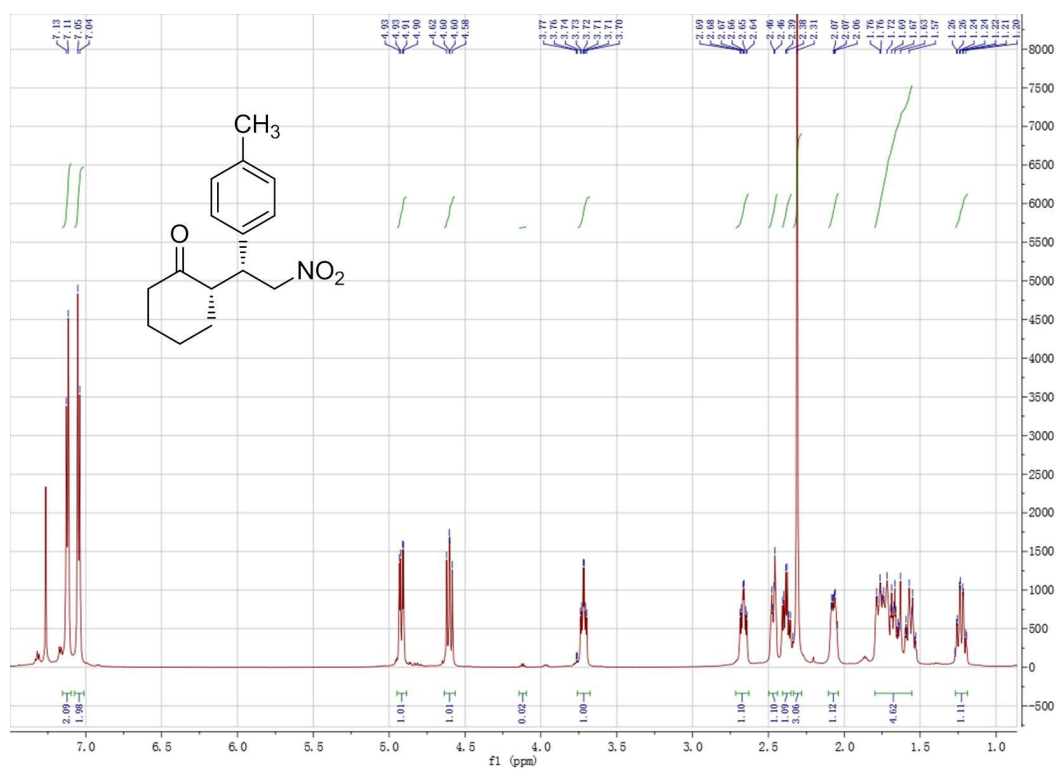

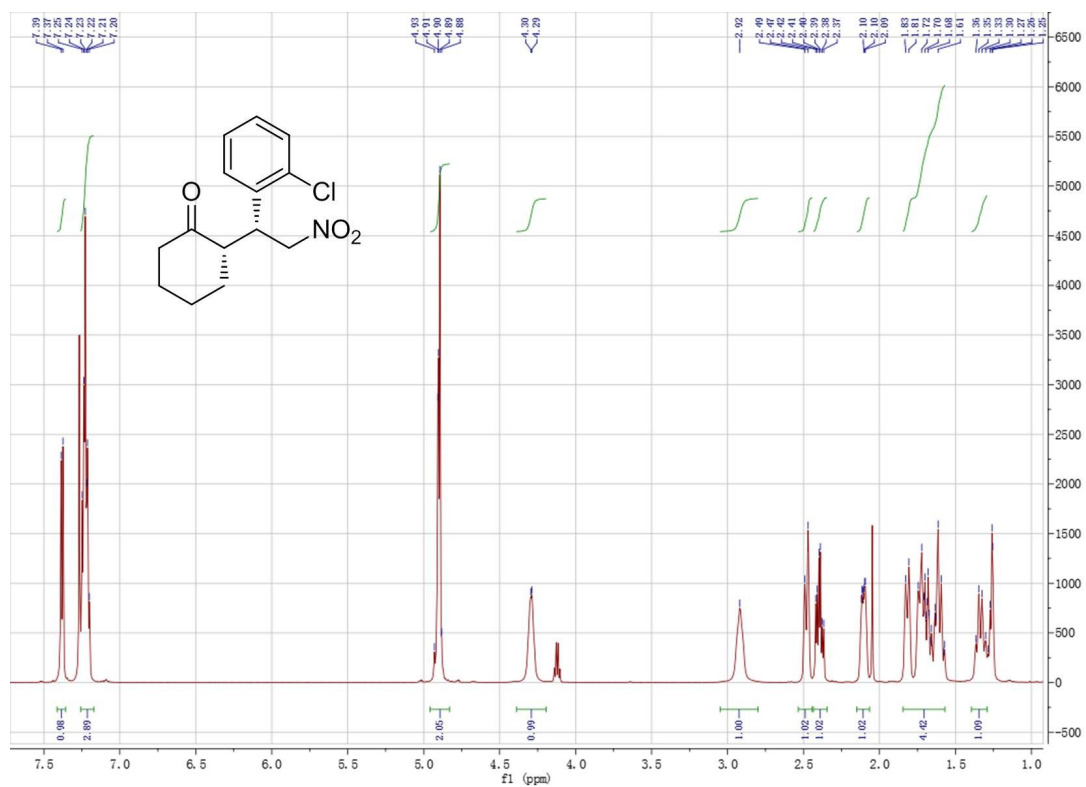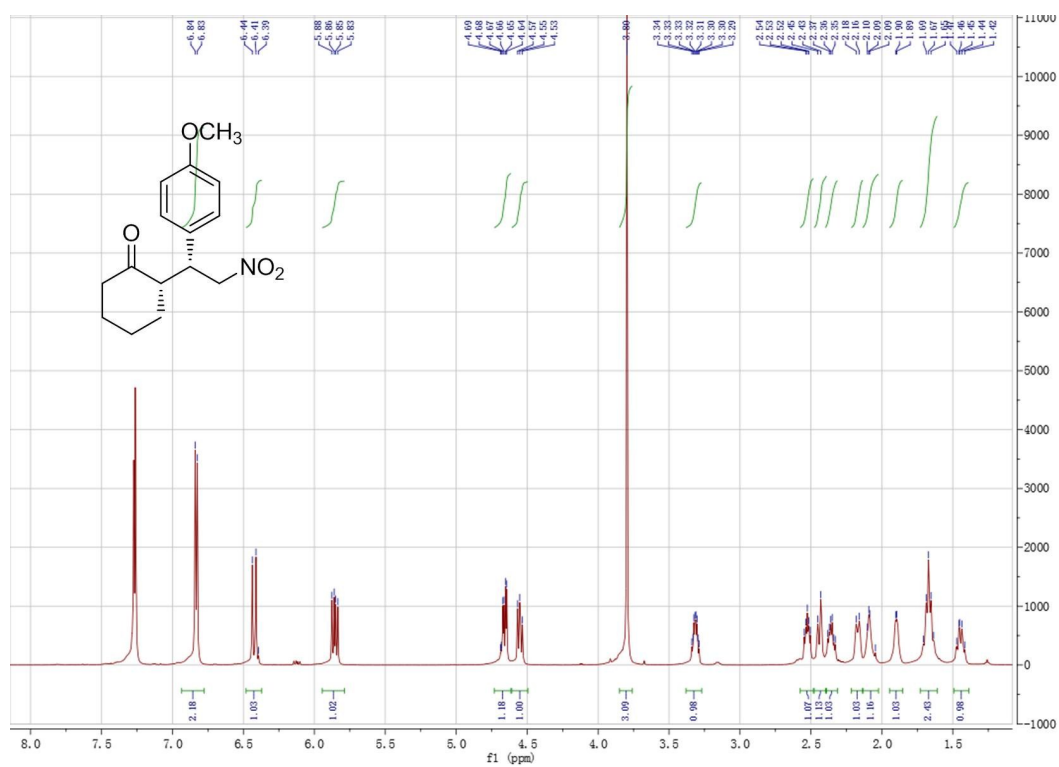

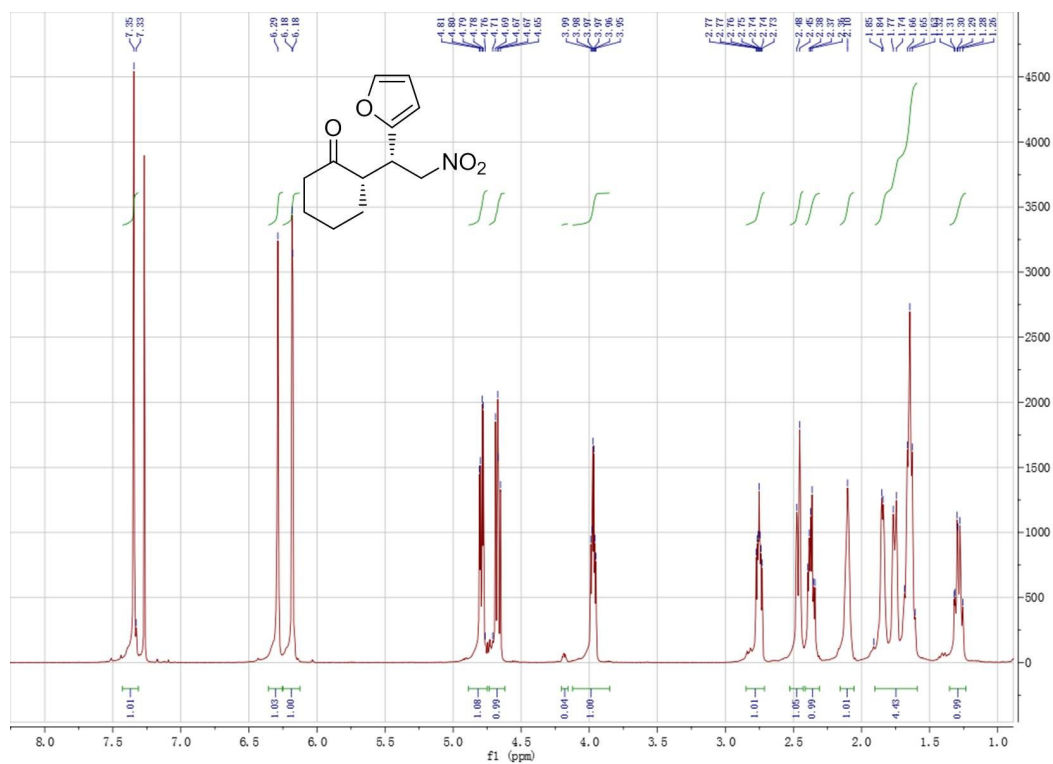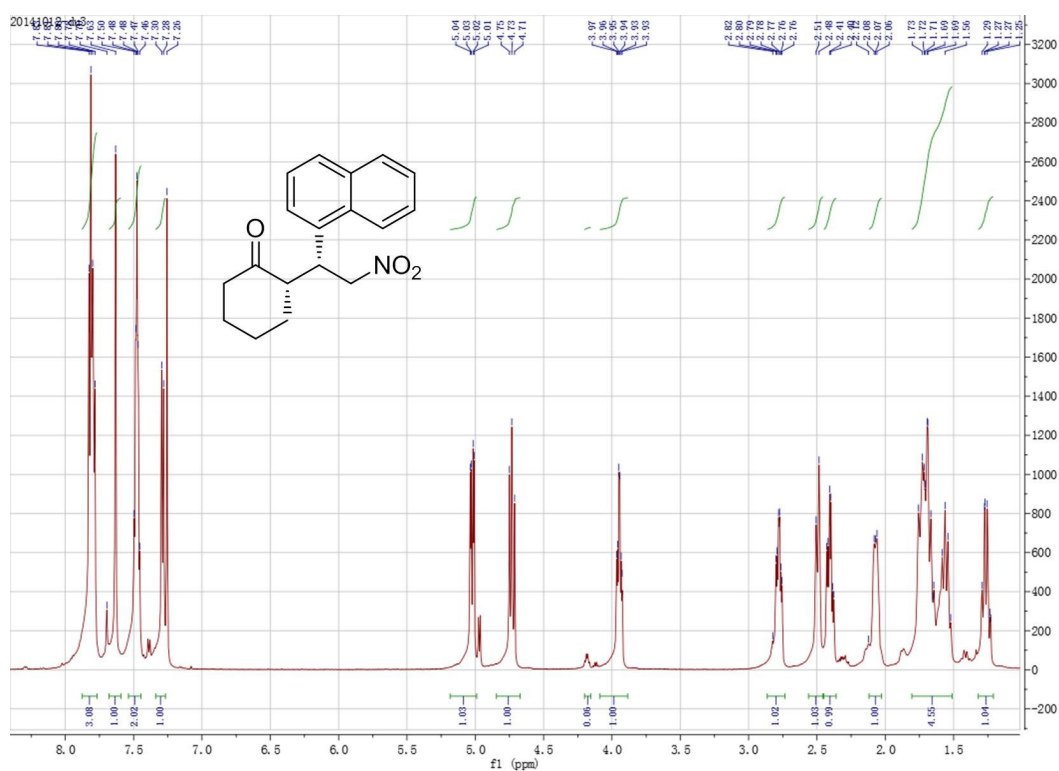

**(B)HPLC spectra**

**(S)-2-[(R)-2-Nitro-1-phenylethyl]cyclohexanone (4a):**

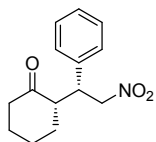

Racemic:

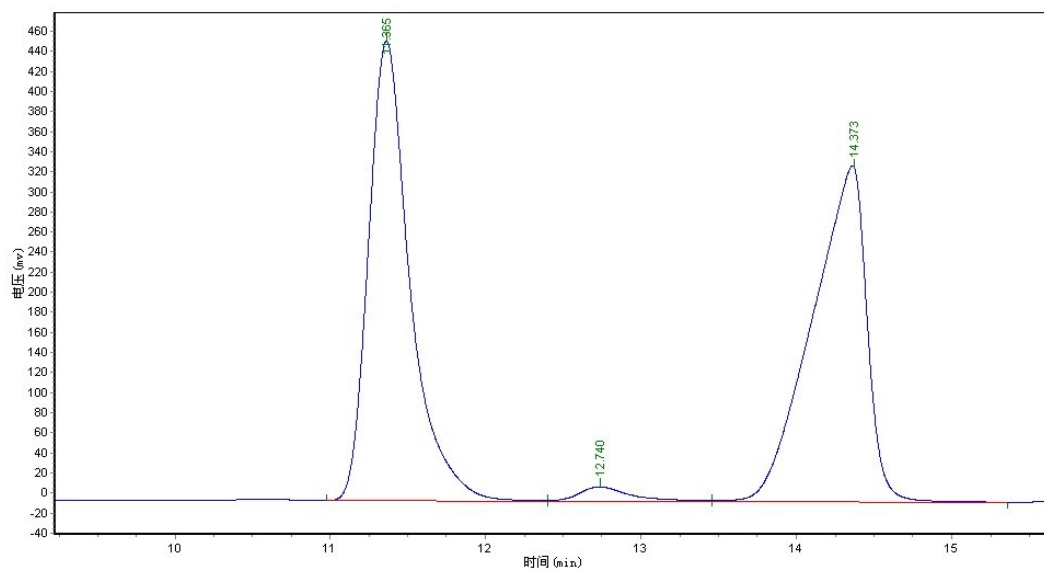

| entry | R.T. (min) | Height | Area    | Area %  |
|-------|------------|--------|---------|---------|
| 1     | 11.365     | 458158 | 8511790 | 50.0117 |
| 2     | 12.740     | 14456  | 332384  | 1.9530  |
| 3     | 14.373     | 334280 | 8175413 | 48.0353 |

Nonracemic: Table 3, entry 1

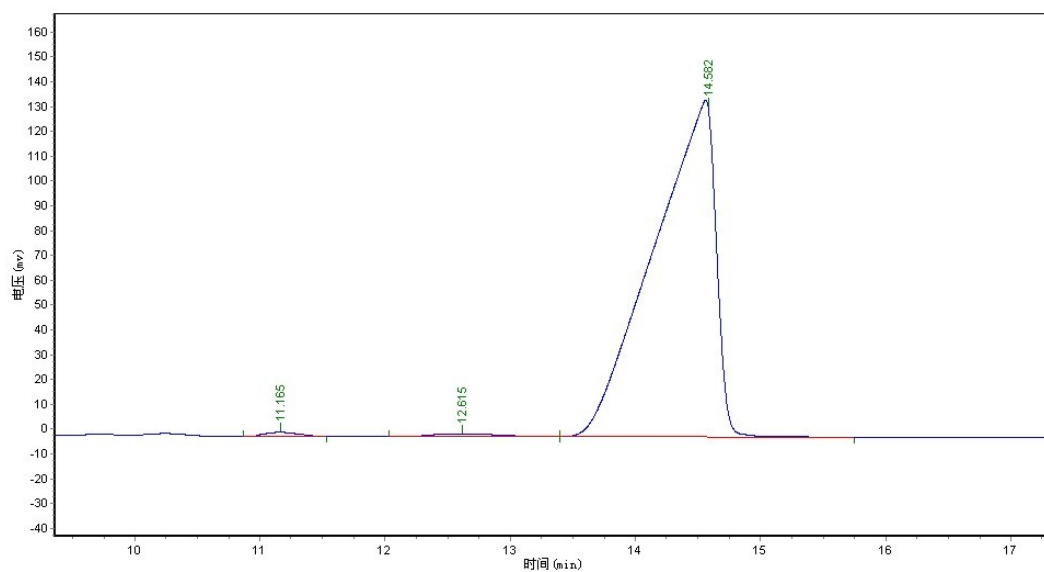

| entry | R.T. (min) | Height | Area  | Area % |
|-------|------------|--------|-------|--------|
| 1     | 11.165     | 1655   | 29836 | 0.6278 |

|   |        |        |         |         |
|---|--------|--------|---------|---------|
| 2 | 12.615 | 1104   | 41960   | 0.8829  |
| 3 | 14.582 | 135086 | 4680611 | 98.4893 |

**(S)-2-[(R)-2-Nitroethyl-1-(4-nitrophenyl)]cyclohexanone (4b):**

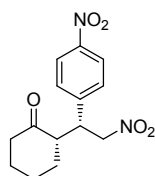

Racemic:

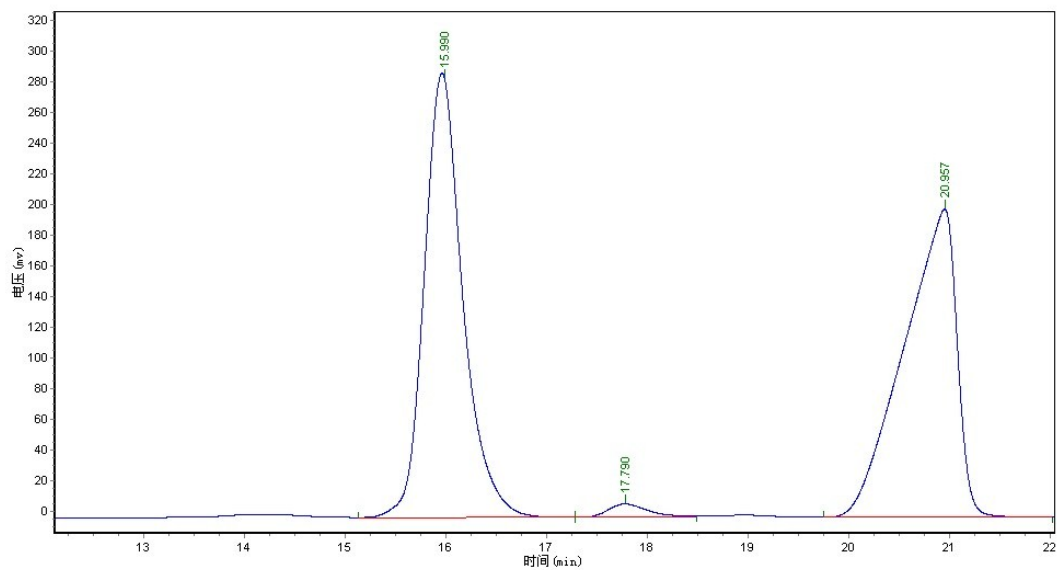

| entry | R.T. (min) | Height | Area    | Area %  |
|-------|------------|--------|---------|---------|
| 1     | 15.990     | 288796 | 7703755 | 50.3775 |
| 2     | 17.790     | 8732   | 247181  | 1.6164  |
| 3     | 20.957     | 200100 | 7341127 | 48.0061 |

Nonracemic: Table 3, entry 2

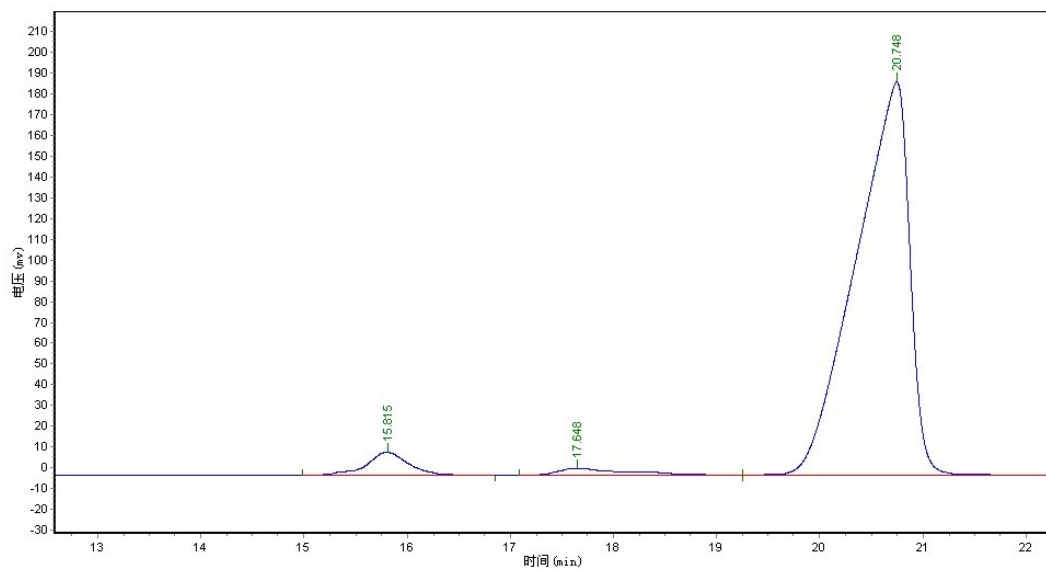

| entry | R.T. (min) | Height | Area    | Area %  |
|-------|------------|--------|---------|---------|
| 1     | 15.815     | 11010  | 317087  | 4.3206  |
| 2     | 17.648     | 3347   | 166963  | 2.2750  |
| 3     | 20.748     | 188513 | 6854952 | 93.4044 |

**(S)-2-[(R)-1-(4-Fluorophenyl)-2-nitroethyl]cyclohexanone (4c):**

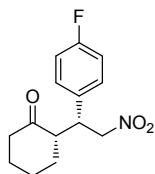

**Racemic:**

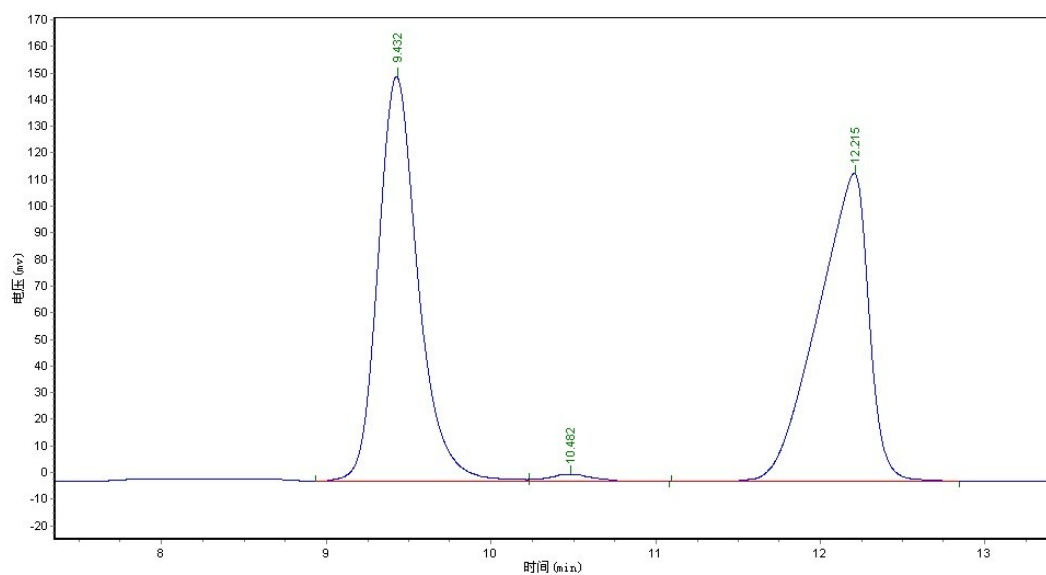

| entry | R.T. (min) | Height | Area    | Area %  |
|-------|------------|--------|---------|---------|
| 1     | 9.432      | 151778 | 2566206 | 50.2029 |
| 2     | 10.482     | 2707   | 50752   | 0.9929  |



|   |        |        |         |         |
|---|--------|--------|---------|---------|
| 3 | 12.215 | 115366 | 2494707 | 48.8042 |
|---|--------|--------|---------|---------|

Nonracemic: Table 3, entry 3

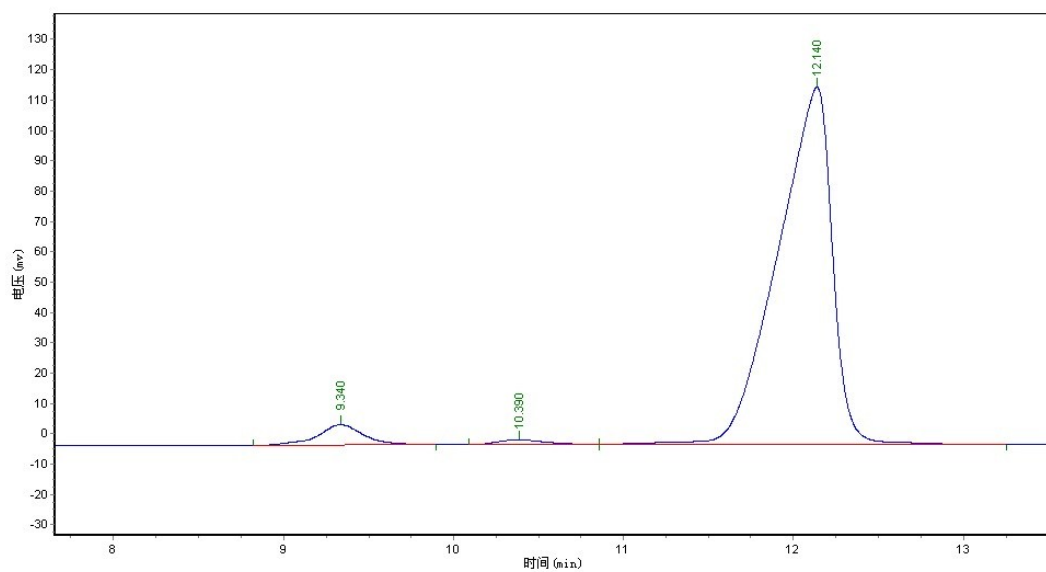

| entry | R.T. (min) | Height | Area    | Area %  |
|-------|------------|--------|---------|---------|
| 1     | 9.340      | 6690   | 126032  | 4.5069  |
| 2     | 10.390     | 1705   | 34489   | 1.2333  |
| 3     | 12.140     | 117463 | 2635899 | 94.2598 |

**(S)-2-[(R)-1-(4-Chlorophenyl)-2-nitroethyl]cyclohexanone (4d):**

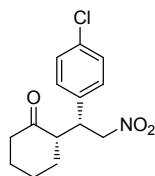

Racemic:

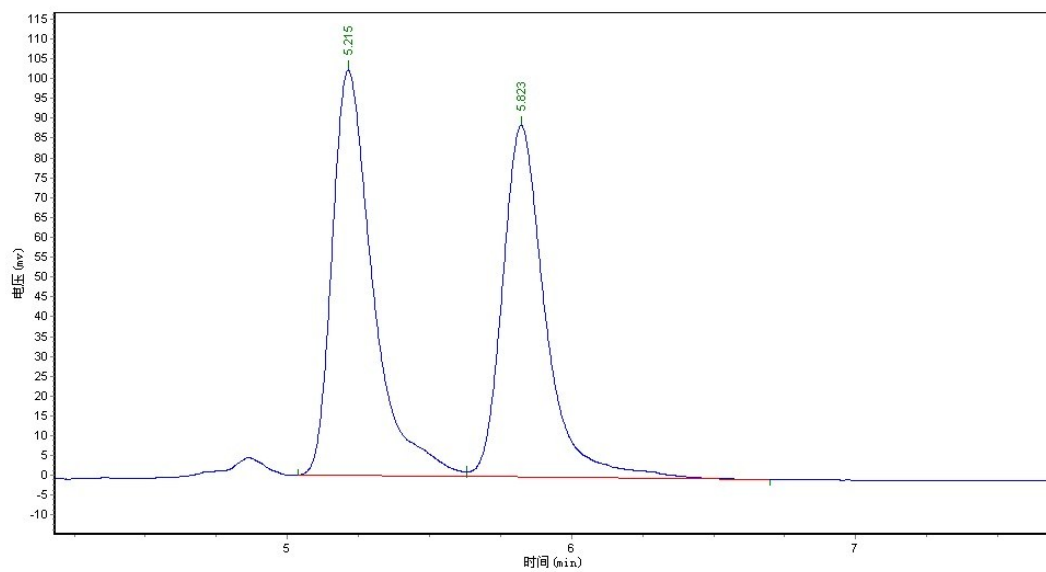

| entry | R.T. (min) | Height | Area    | Area %  |
|-------|------------|--------|---------|---------|
| 1     | 5.215      | 101931 | 1017520 | 52.2363 |
| 2     | 5.823      | 88480  | 930298  | 47.7637 |

Nonracemic: Table 3, entry 4

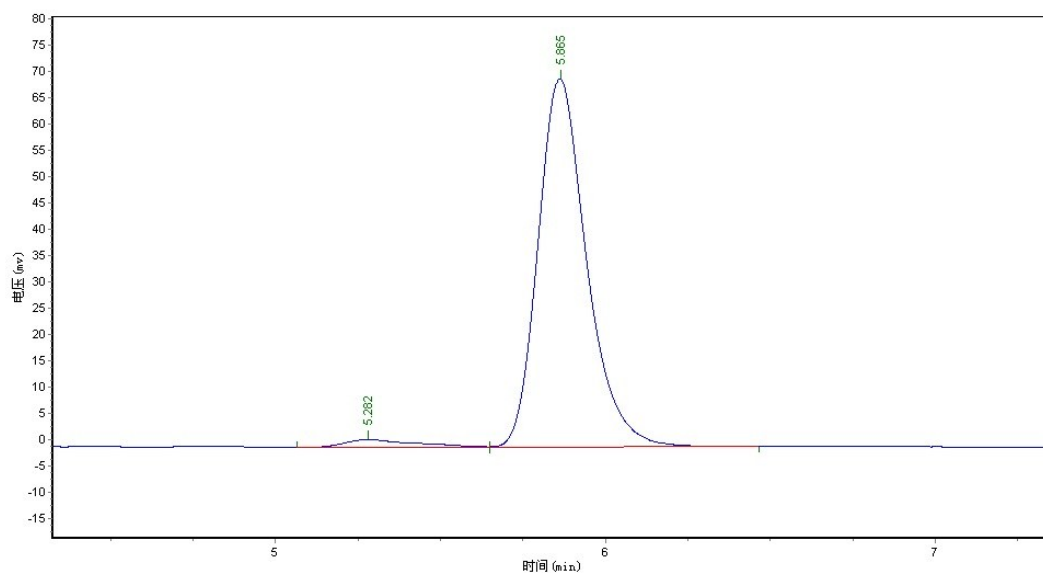

| entry | R.T. (min) | Height | Area   | Area %  |
|-------|------------|--------|--------|---------|
| 1     | 5.282      | 1505   | 21309  | 2.8994  |
| 2     | 5.865      | 70043  | 713657 | 97.1006 |

**(S)-2-[(R)-1-(4-Bromophenyl)-2-nitroethyl]cyclohexanone (4e):**

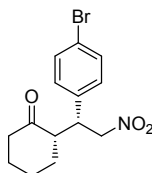

Racemic:

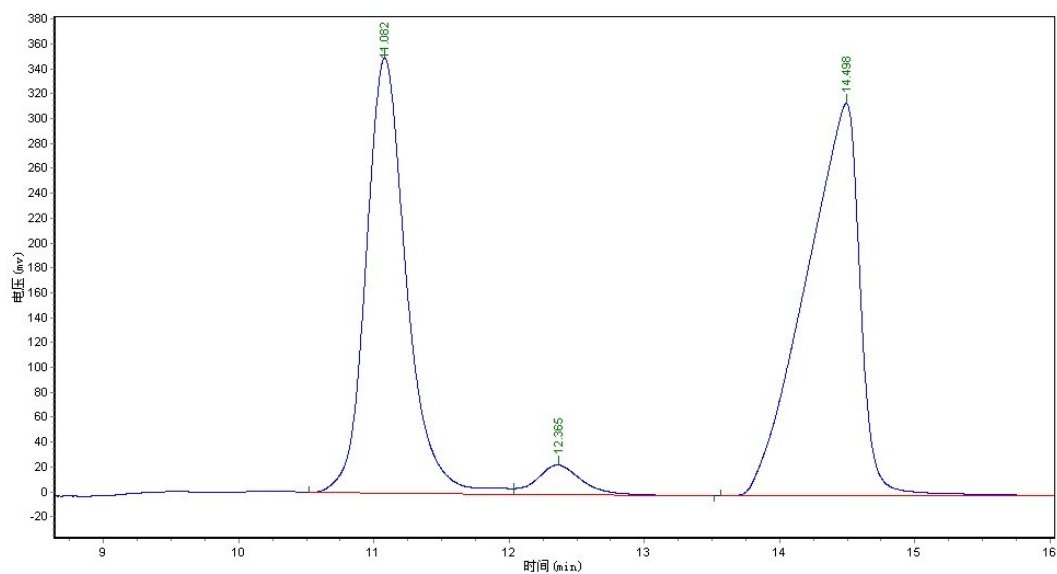

| entry | R.T. (min) | Height | Area    | Area %  |
|-------|------------|--------|---------|---------|
| 1     | 11.090     | 350679 | 7463922 | 44.2103 |
| 2     | 12.357     | 24558  | 609961  | 3.6129  |
| 3     | 14.523     | 312399 | 8808878 | 52.1768 |

Nonracemic: Table 3, entry 5

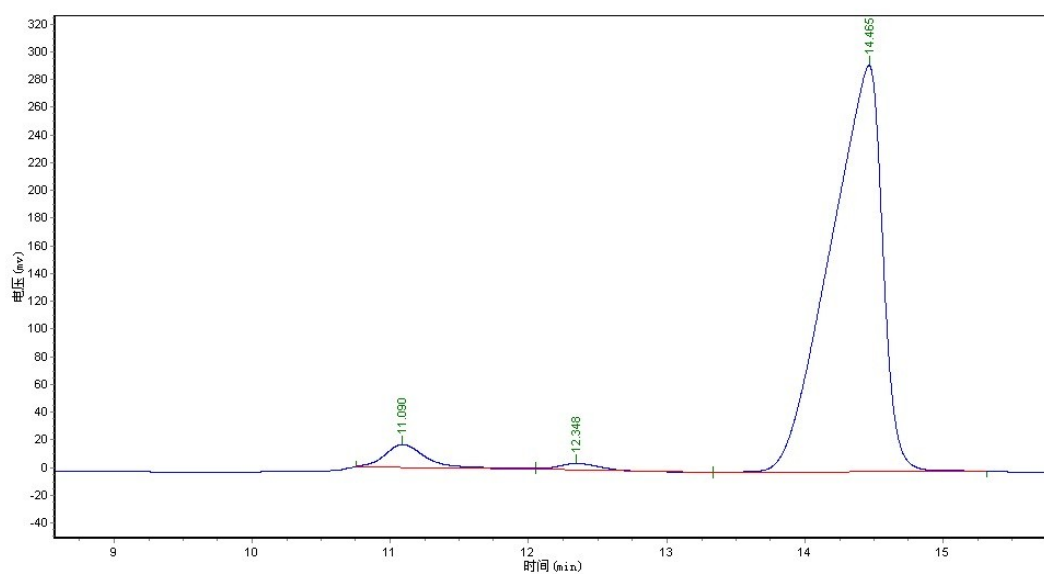

| entry | R.T. (min) | Height | Area    | Area %  |
|-------|------------|--------|---------|---------|
| 1     | 11.090     | 16442  | 351219  | 4.3062  |
| 2     | 12.348     | 4816   | 86738   | 1.0635  |
| 3     | 14.465     | 292851 | 7718239 | 94.6304 |

**(S)-2-[(R)-2-Nitroethyl-1-(3-phenoxy)] cyclohexanone (4f):**

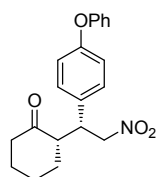

Racemic:

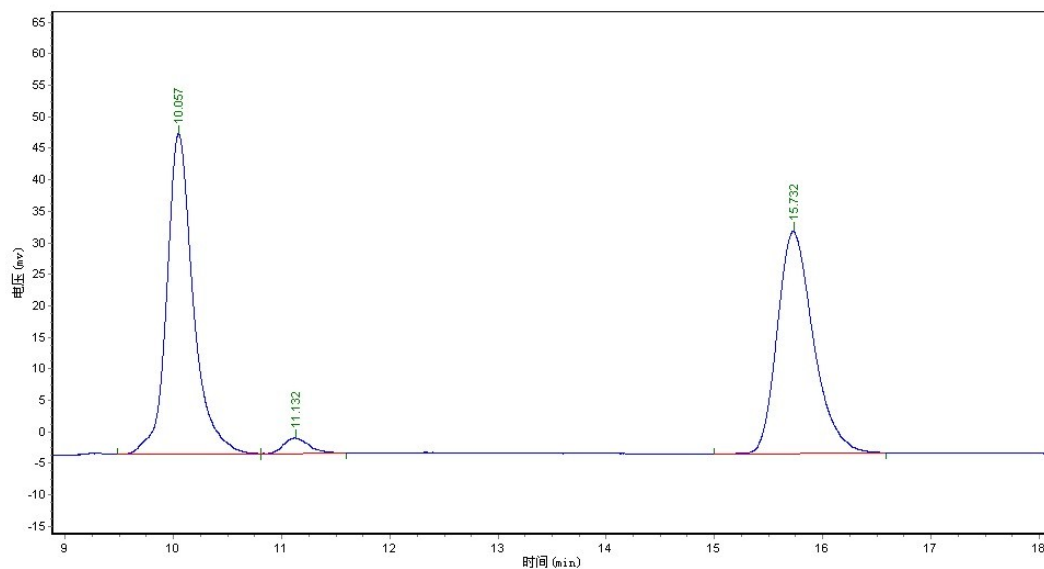

| entry | R.T. (min) | Height | Area   | Area %  |
|-------|------------|--------|--------|---------|
| 1     | 10.057     | 50983  | 871796 | 50.2566 |
| 2     | 11.132     | 2553   | 45843  | 2.6427  |
| 3     | 15.732     | 35246  | 817091 | 47.1007 |

Nonracemic: Table 3, entry 6

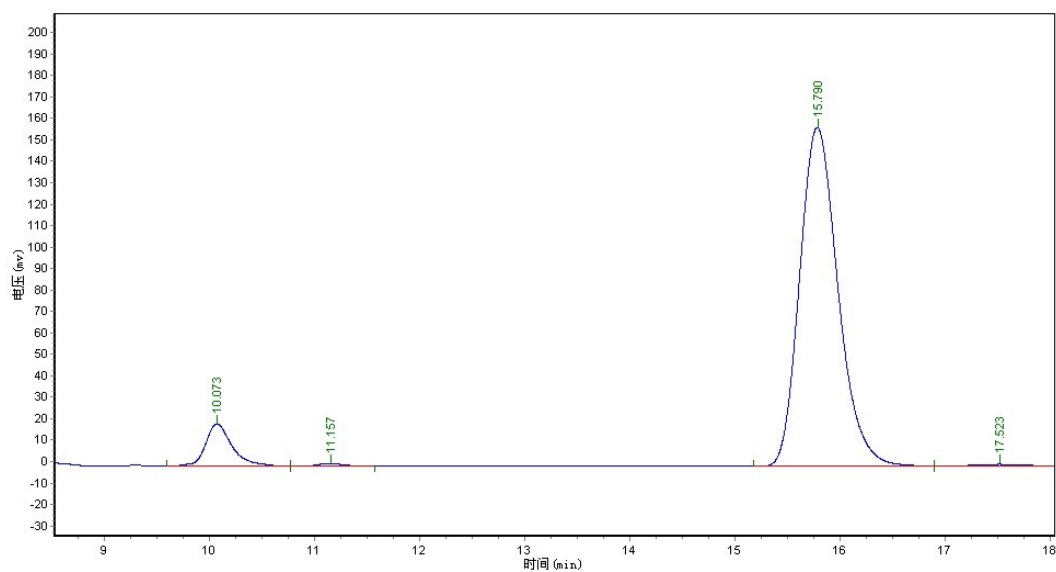

| entry | R.T. (min) | Height | Area   | Area % |
|-------|------------|--------|--------|--------|
| 1     | 10.073     | 19613  | 342332 | 7.8062 |

|   |        |        |         |         |
|---|--------|--------|---------|---------|
| 2 | 11.157 | 1117   | 20659   | 0.4711  |
| 3 | 15.790 | 147847 | 3998965 | 91.1885 |
| 4 | 17.523 | 723    | 23427   | 0.5342  |

(*S*)-2-[(*R*)-2-Nitro-1-(*p*-tolyl)ethyl]cyclohexanone (4g):

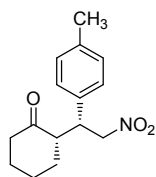

Racemic:

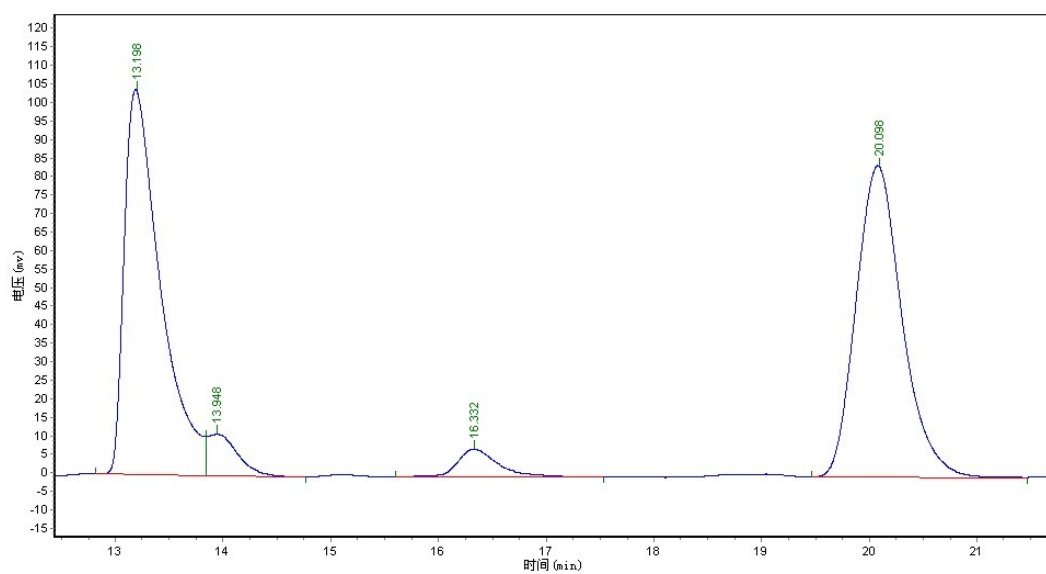

| entry | R.T. (min) | Height | Area    | Area %  |
|-------|------------|--------|---------|---------|
| 1     | 13.198     | 104438 | 2465060 | 45.7891 |
| 2     | 13.948     | 11466  | 223032  | 4.1429  |
| 3     | 16.332     | 7492   | 200674  | 3.7276  |
| 4     | 20.098     | 84062  | 2494738 | 46.3404 |

Nonracemic: Table 3, entry 7

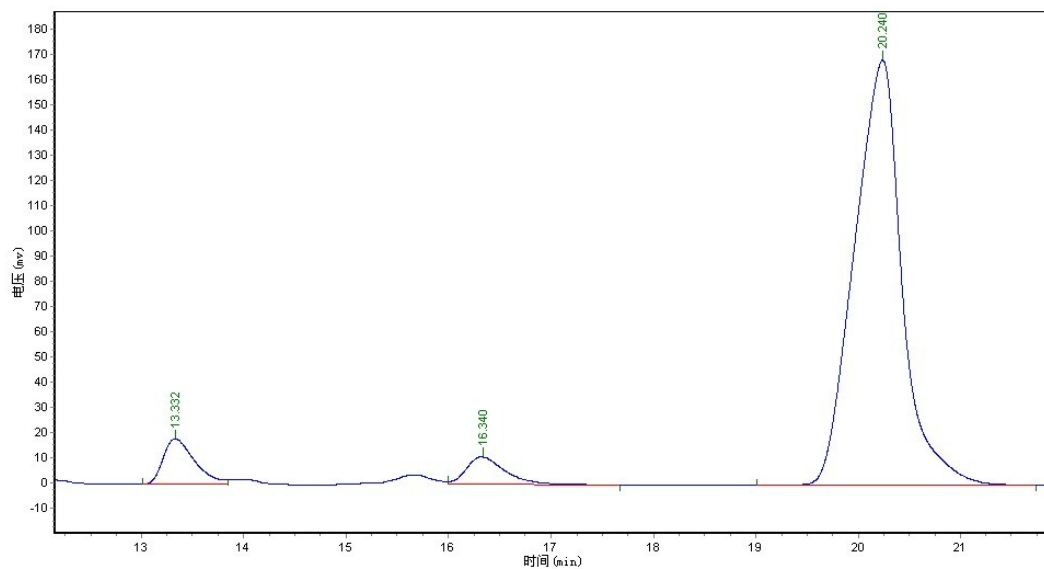

| entry | R.T. (min) | Height | Area    | Area %  |
|-------|------------|--------|---------|---------|
| 1     | 13.332     | 18096  | 402050  | 6.5520  |
| 2     | 16.332     | 11127  | 307177  | 5.0059  |
| 3     | 20.265     | 167689 | 5427117 | 88.4422 |

**(S)-2-[(R)-1-(2-Chlorophenyl)-2-nitroethyl] cyclohexanone (4h):**

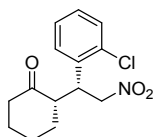

**Racemic:**

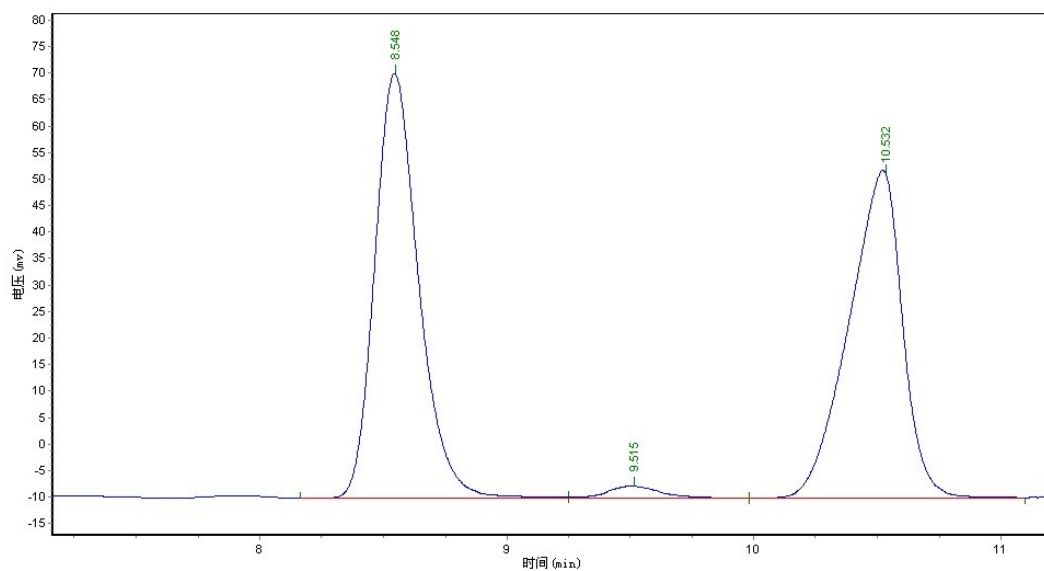

| entry | R.T. (min) | Height | Area   | Area %  |
|-------|------------|--------|--------|---------|
| 1     | 8.548      | 80020  | 982452 | 50.6310 |
| 2     | 9.507      | 2128   | 9645   | 1.5278  |
| 3     | 10.523     | 61794  | 928320 | 47.8413 |

Nonracemic: Table 3, entry 8

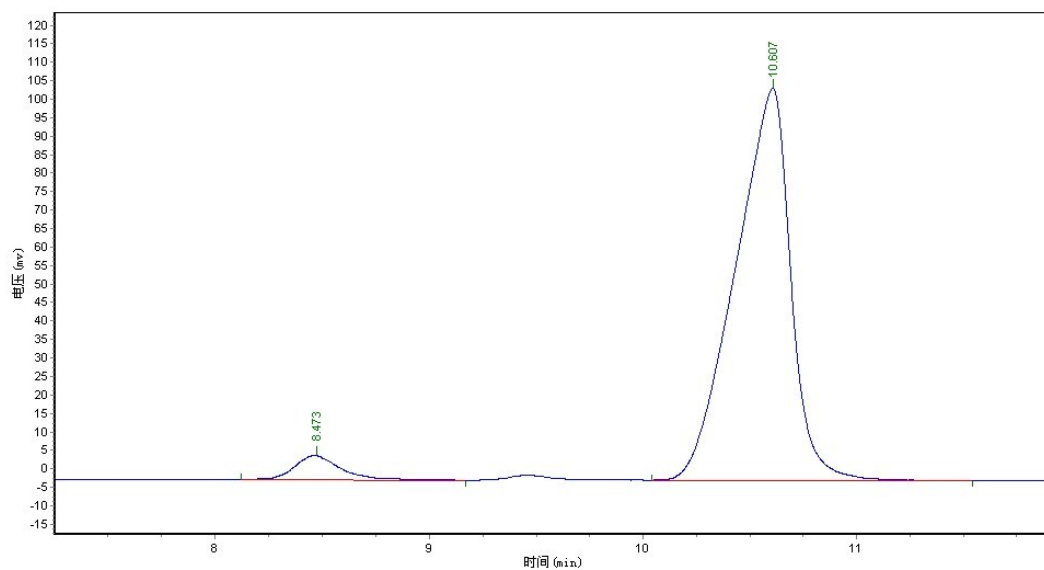

| entry | R.T. (min) | Height | Area    | Area %  |
|-------|------------|--------|---------|---------|
| 1     | 8.473      | 6584   | 101989  | 5.0332  |
| 2     | 9.473      | 1287   | 19570   | 0.9658  |
| 3     | 10.607     | 105678 | 1904791 | 94.0010 |

**(S)-2-((R)-1-(4-Methoxyphenyl)-2-nitroethyl)cyclohexanone (4i):**

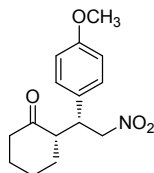

Racemic:

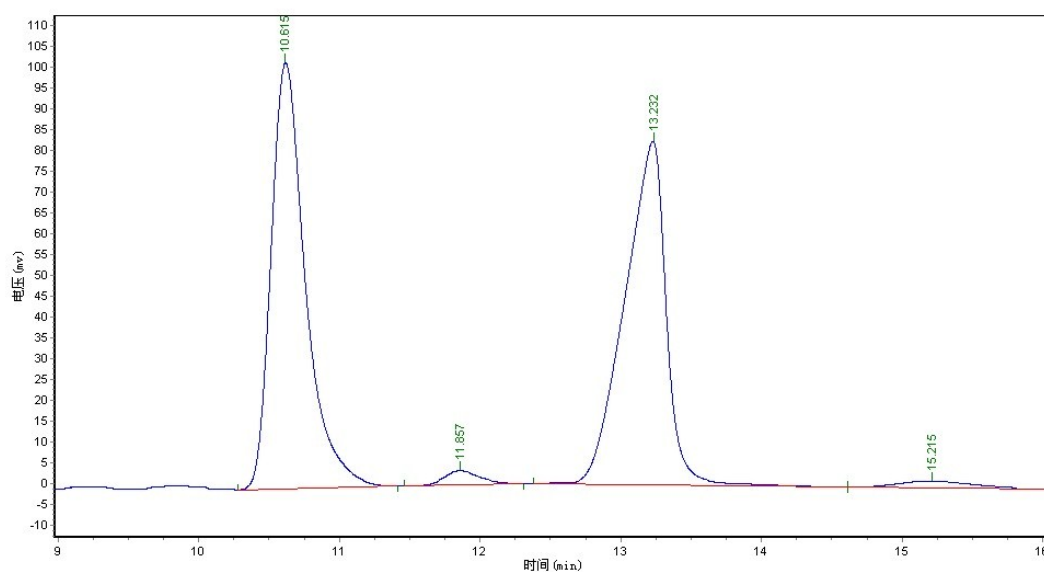

| entry | R.T. (min) | Height | Area | Area % |
|-------|------------|--------|------|--------|
|-------|------------|--------|------|--------|

|   |        |        |         |         |
|---|--------|--------|---------|---------|
| 1 | 10.615 | 102010 | 1732744 | 48.8421 |
| 2 | 11.857 | 3441   | 60135   | 1.6951  |
| 3 | 13.232 | 82306  | 1691280 | 47.6733 |
| 4 | 15.215 | 1689   | 63484   | 1.7895  |

Nonracemic: Table 3, entry 9

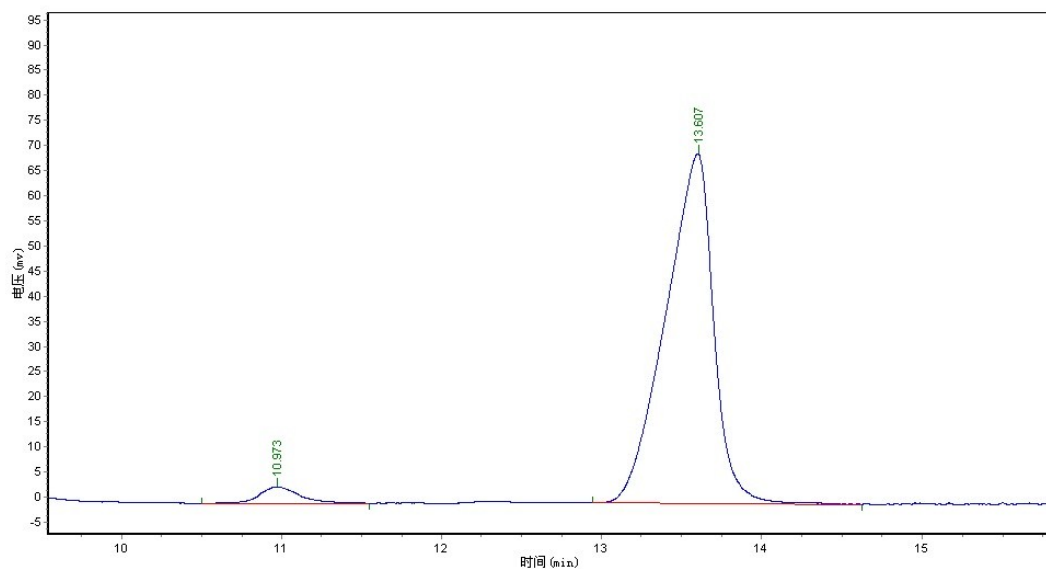

| entry | R.T. (min) | Height | Area    | Area %  |
|-------|------------|--------|---------|---------|
| 1     | 10.973     | 3242   | 56890   | 3.7486  |
| 2     | 13.607     | 69708  | 1460742 | 96.2514 |

**(S)-2-[(S)-1-(Furan-2-yl)-2-nitroethyl]cyclohexanone (4j)**

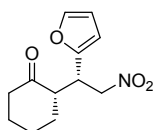

Racemic:



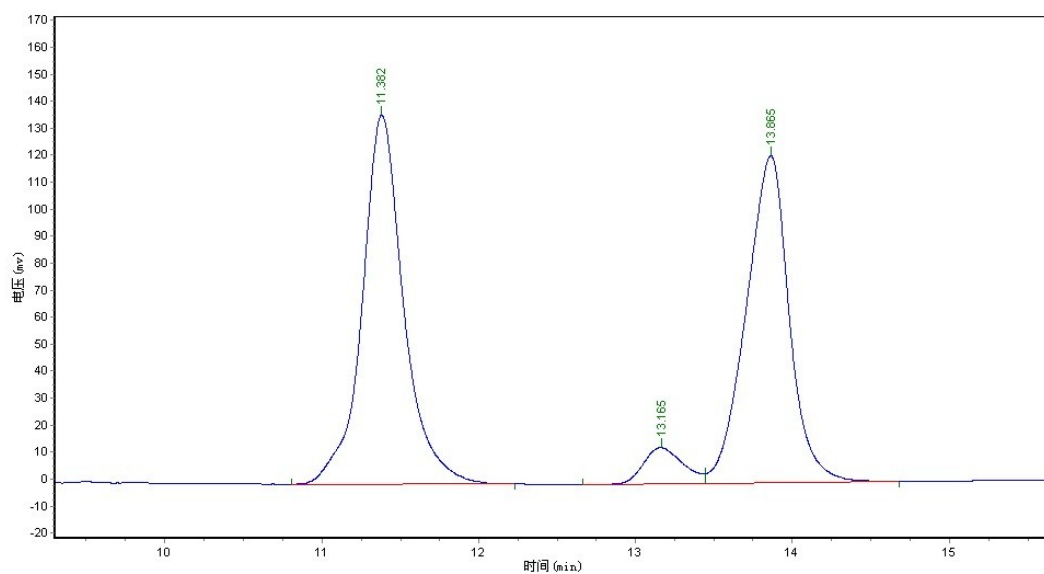

| entry | R.T. (min) | Height | Area    | Area %  |
|-------|------------|--------|---------|---------|
| 1     | 11.382     | 136624 | 2518906 | 49.8406 |
| 2     | 13.165     | 13249  | 230930  | 4.5693  |
| 3     | 13.865     | 120829 | 2304085 | 45.5900 |

Nonracemic: Table 3, entry 10

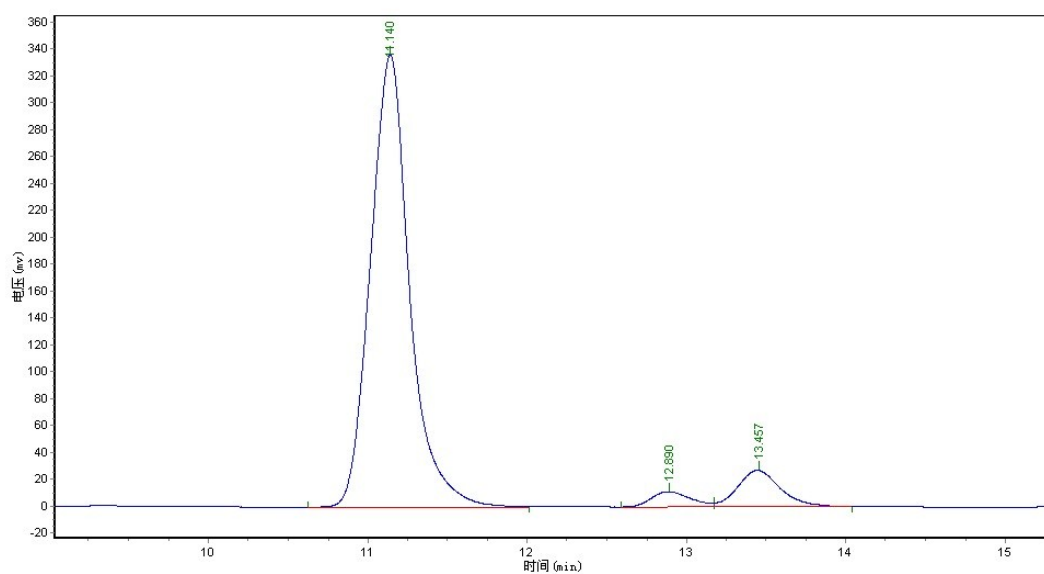

| entry | R.T. (min) | Height | Area    | Area %  |
|-------|------------|--------|---------|---------|
| 1     | 11.140     | 335957 | 5753808 | 88.7646 |
| 2     | 12.890     | 11581  | 203717  | 3.1428  |
| 3     | 13.457     | 22447  | 524573  | 8.0927  |

**(S)-2-[(R)-(1-Naphthalen-1-yl)-2-nitroethyl]cyclohexanone (4k):**

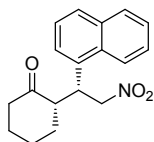

Racemic:

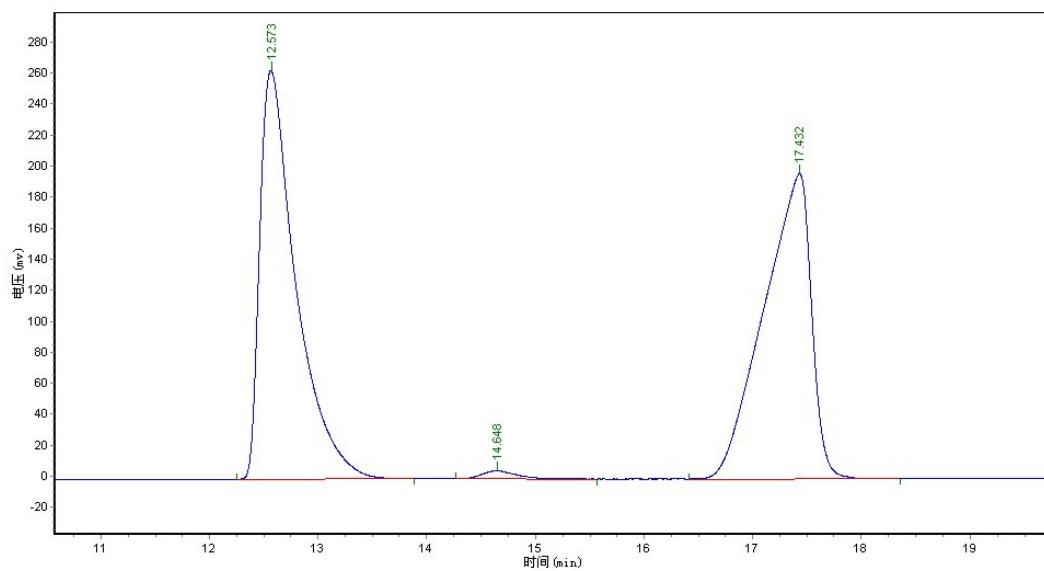

| entry | R.T. (min) | Height | Area    | Area %  |
|-------|------------|--------|---------|---------|
| 1     | 12.573     | 263435 | 6084497 | 49.9246 |
| 2     | 14.648     | 5152   | 116814  | 0.9585  |
| 3     | 17.432     | 196251 | 5986060 | 49.1169 |

Nonracemic: Table 3, entry 11

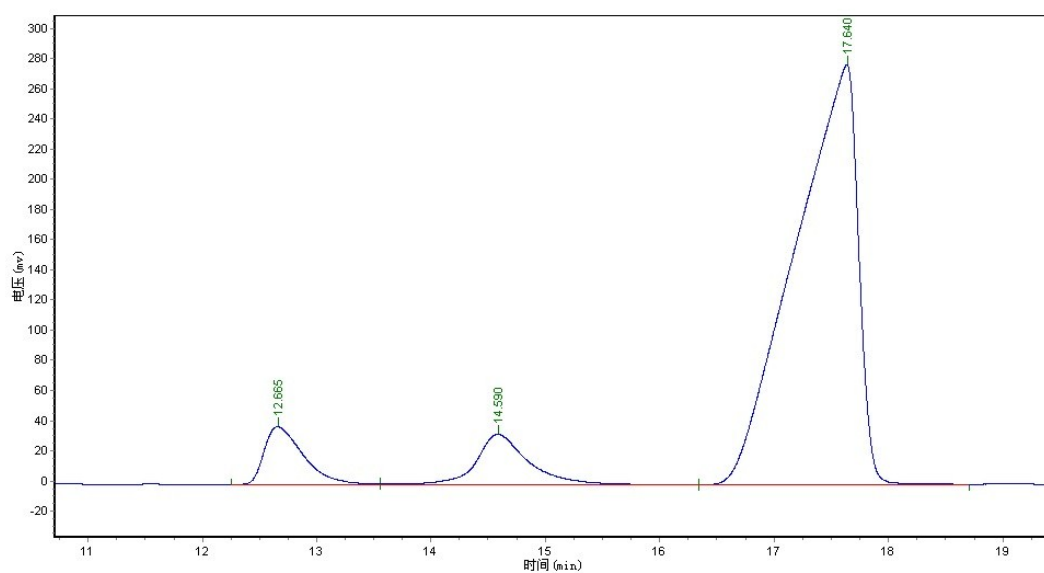

| entry | R.T. (min) | Height | Area    | Area % |
|-------|------------|--------|---------|--------|
| 1     | 12.665     | 38321  | 911333  | 7.2161 |
| 2     | 14.590     | 33137  | 1064762 | 8.4310 |

|   |        |        |          |         |
|---|--------|--------|----------|---------|
| 3 | 17.640 | 277350 | 10653023 | 84.3529 |
|---|--------|--------|----------|---------|

- (1) Lawandi, J.; Toumieux, S.; Seyer, V.; Campbell, P.; Thielges, S.; Juillerat-Jeanneret, L.; Moitessier, N. *J. Med. Chem.* **2009**, *52*, 6672.
- (2) Alza, E.; Cambeiro, X. C.; Jimeno, C.; Pericàs, M. A. *Org Lett* **2007**, *9*, 3717.
- (3) Font, D.; Jimeno, C.; Pericàs, M. A. *Org Lett* **2006**, *8*, 4653.
- (4) Shunkevich, A.; Akulich, Z.; Mediak, G.; Soldatov, V. *Reactive and Functional Polymers* **2005**, *63*, 27.
- (5) Zhao, H.-W.; Li, H.-L.; Yue, Y.-Y.; Sheng, Z.-H. *Eur. J. Org. Chem.* **2013**, *2013*, 1740.
- (6) Lin, J.; Tian, H.; Jiang, Y.-J.; Huang, W.-B.; Zheng, L.-Y.; Zhang, S.-Q. *Tetrahedron: Asymmetry* **2011**, *22*, 1434.
- (7) Ishii, T.; Fujioka, S.; Sekiguchi, Y.; Kotsuki, H. *J Am Chem Soc* **2004**, *126*, 9558.
